# Supplementary material
Source: PubMed Central journal article supplement (PMC4636050)
Supplement: NIHMS65871-supplement-Correction.pdf [file NIHMS65871-supplement-Correction.pdf]

Additional Information for **de Bruin et al. *Science* 346, 251 (2014)**;

**Correction (22 December 2014):** The sequence data have been deposited as described in the Acknowledgments under accession numbers EGAS00001000840 and EGAS00001000809.
