# Supplementary material
Source: PubMed Central journal article supplement (PMC4636050)
Supplement: NIHMS65871-supplement-Supplementary__methods__figures_and_tables.pdf [file NIHMS65871-supplement-Supplementary__methods__figures_and_tables.pdf]

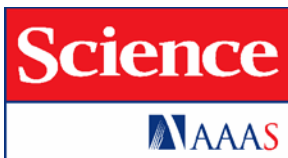

Supplementary Materials for  
**Spatial and temporal diversity in genomic instability processes defines lung cancer evolution**

Elza C. de Bruin, Nicholas McGranahan, Richard Mitter, Max Salm, David C. Wedge, Lucy Yates, Mariam Jamal-Hanjani, Seema Shafi, Nirupa Murugaesu, Andrew J. Rowan, Eva Grönroos, Madiha A. Muhammad, Stuart Horswell, Marco Gerlinger, Ignacio Varela, David Jones, John Marshall, Thierry Voet, Peter Van Loo, Doris M. Rassl, Robert C. Rintoul, Sam M. Janes, Siow-Ming Lee, Martin Forster, Tanya Ahmad, David Lawrence, Mary Falzon, Arrigo Capitanio, Timothy T. Harkins, Clarence C. Lee, Warren Tom, Enock Teeffe, Shann-Ching Chen, Sharmin Begum, Adam Rabinowitz, Benjamin Phillimore, Bradley Spencer-Dene, Gordon Stamp, Zoltan Szallasi, Nik Matthews, Aengus Stewart, Peter Campbell, Charles Swanton\*

\*Corresponding author. E-mail: [charles.swanton@cancer.org.uk](mailto:charles.swanton@cancer.org.uk)

Published 10 October 2014, *Science* **346**, 251 (2014)  
DOI: 10.1126/science.1253462

**This PDF file includes**

Materials and Methods  
Figs. S1 to S14  
Tables S1 to S4  
References

## **Materials and Methods**

### Patient Cohort Description

Samples for sequencing were obtained from patients diagnosed with NSCLC who underwent definitive surgical resection prior to receiving any form of adjuvant therapy, such as chemotherapy or radiotherapy. Informed consent allowing for genome sequencing had been obtained. Six samples were collected from University College London Hospital, London (UCLHRTB 10/H1306/42) and one sample was collected from Papworth Hospital, Cambridge (PHRTB 08/H0304/56). All tumors were subjected to pathology review to establish the histological subtype: five tumors were classified with CK7+/TTF1+ adenocarcinoma (L001, L003, L008 and L011) or poorly-differentiated CK7+ carcinoma (L004) histology (LUAD), one tumor (LS01) with squamous cell carcinoma histology (LUSC) and one tumor (L002) with adenosquamous histology (LUAD/LUSC; Fig S2). Tumor stages ranged from IB to IIIB. Two patients presented with disease in two separate lobes of the lung (L003 and L008), patient L001 presented with a germ-line MEN1 mutation. The median patient age was 75.5 years (range 59-84). One patient reported no history of tobacco smoking, three patients reported smoking (current smokers) and three reported previous smoking histories (former smokers). Detailed clinical characteristics are provided in table S1.

### Tumor processing

Up to five regions from a single tumor mass, separated by 1cm intervals, and adjacent normal tissue were selected by a pathologist, documented by photography, and snap-frozen. Peripheral blood was collected at the time of surgery from all patients and snap-frozen, except from L001. Approximately 5x5x5mm tumor tissue and 500µl of blood was used for genomic DNA extraction, using the DNeasy kit (Qiagen) according to manufacturer's protocol. DNA was quantified by Qubit (Invitrogen) and DNA integrity was examined by agarose gel electrophoresis.

### DNA ploidy analysis

A small piece of each tumor region (approximately 1x5x5mm) was minced and incubated with 0.5% pepsin in PBS for 30 minutes at 37°C to obtain a single nuclei suspension. Nuclei were washed twice with PBS, fixed in 70% ethanol for 1 hour at room temperature, and again washed twice with PBS. Nuclei were resuspended in a propidium iodide (50µg/ml) solution in PBS and incubated on ice for 30 minutes, washed with PBS and analysed by FACs (488nm) to determine the DNA content using matched normal lung cells as control.

### Multi region Whole-Exome Sequencing

For each tumor region and matched germ-line, exome capture was performed on 1-2 µg DNA using the Agilent Human All Exome V4 kit according to the manufacturer's protocol (Agilent). Samples were paired-end multiplex sequenced on the Illumina GAI or HiSeq 2500 at the Advanced Sequencing Facility at the LRI, as described previously (27, 28). Each captured library was loaded on the Illumina platform and paired-end sequenced to the desired average sequencing depth (approximately 100x, detailed coverage information is provided in table S2).

### Multi region Whole-Genome Sequencing Illumina platform

For four tumor regions (L002\_R1 and R3, and L008\_R1 and R3) and matched blood, whole-genome paired-end sequencing was performed by Illumina Cambridge LTD, using 1µg DNA, to the desired average sequencing depth (approximately 100x for the tumor regions and 40x for germ-line, detailed coverage information is provided in table S2).

### SNV calling from multi-region WES and WGS data Illumina platform

Raw paired end reads in FastQ format generated by the Illumina pipeline (WES or WGS) were aligned to the full hg19 genomic assembly (including unknown contigs), using bwa 0–5.9 (38) with a seed length of 72 bp for data sequenced on the GAII and 100 bp for data sequenced on the HiSeq. Up to 3 or 4 mismatches were allowed per read for the GAII or HiSeq respectively, all other settings were left as default. Picard tools v1.8 was used to merge samples from the same patient region and to remove duplicate reads (<http://picard.sourceforge.net>) prior to determining sequence coverage (table S2).

Variant calling was performed between tumor and matched germ-line using the “somatic” tool from VarScan2 v2.3.3 (39). The input for VarScan2 was the SAMtools (40) mpileup output from combined tumor and normal samples generated by skipping bases with a phred score of <20 or reads with a mapping-quality <20. SAMtools BAQ computation was disabled and the coefficient for downgrading mapping quality was set to 50. VarScan2 somatic was run with default settings except for the following: minimum coverage was set to 10 for germline and 6 for tumor regions, the minimum variant sequency for calling a heterozygote was set to 0.01 and tumor purity was set to 0.5. The resulting calls were filtered for false positives using Varscan2's associated fpfilter.pl script, run with settings as described by Ding *et al.* (41). Additionally, variants were only accepted if present in  $\geq 5\%$  of reads in at least one tumor region and present with  $\leq 2$  reads in germ-line and  $\geq 2$  reads in a tumor region.

Small insertions and deletions (indels) were identified using Pindel version 0.2.4 pindel (42) in paired tumor-normal mode as previously described (27). All variants were annotated using both ANNOVAR (43) and dbNSFP (44). All variants identified as nonsilent were manually reviewed using Integrated Genomics Viewers (IGV) 38, and those showing an Illumina specific error profile (45) were removed from further analysis. Variants not subjected to ultra-deep orthogonal validation were further filtered using an in-house filter, VarSLR, which models strand-bias, mapping-quality, base-quality and position-in-read in a stepwise logistic regression framework (Salm *et al.*, manuscript in preparation), and removed from further analysis. In addition, any substitution identified in dbSNP Build 132 was removed. For the WGS data, variants detected in repetitive regions (RepeatMasker, USCS genomicSuperDups tracks) or blacklisted by the Encode Mappability were removed from the analysis.

### Multi region Whole-Genome Sequencing SOLiD™ platform

For LS01, all three tumor regions and matched blood, mate paired libraries (2 x50 bp, insert size 1-3kbp) were prepared and sequenced by Life Technologies (Beverly, MA, USA) on the SOLiD™ sequencer as described for the SOLiD™ Mate-Paired Library Construction Kit. Whole-genome sequencing was performed using the Exact Call

Chemistry (ECC) module as previously reported (46). Color space reads were mapped to the hg19 reference genome using SOLiD™ bioscope version 1.3 software and converted to base space. Hard clipping of reads removed an average of 4 bp / 50 bp read mapped. Multiple related bam files were merged and re-headed using samtools (40) and duplicate reads were removed with Picard Tools version 1.60 (<http://picard.sourceforge.net>). Sequence coverage (using Picard Tools version 1.80 (BamIndexStats software)) was estimated after duplicate removal (table S2).

#### SNV calling from multi-region WGS data SOLiD platform

Variant calling was performed using an in-house substitution-calling algorithm, CaVEMan (Cancer Variants through Expectation Maximisation) (18, 47, 48). In brief, this algorithm generates a probability score for each possible genotype at each genomic locus, by comparing tumor and matched normal sequence data to each other and to the reference genome. Copy number and aberrant cell fraction informs the probability score calculation, and was determined for these samples with ASCAT using the whole-genome NGS data combined for the three tumor regions (21). A number of filtering criteria were applied including the following: a SNP probability  $\leq 0.05$ , a mutation probability  $\geq 0.95$ , at least 1/3 of variants have a base quality  $\geq 25$ ,  $\leq 1$  variant with base quality  $\geq 20$  in germ-line, position outside centromeric repeat and more than 5 bases from a simple repeat. Variants reported with the same nucleotide substitution as reported in dbSNP Build 132 and variants present  $\geq 2\%$  in matched normal samples (blood or normal lung) were excluded from the dataset.

#### Ion AmpliSeq™ Custom Validation panel and Comprehensive Cancer Gene Panel sequencing

A total of 1999 mutations (enriched for nonsilent and/or heterogeneous mutations) were subjected to orthogonal validation. For each tumor, an Ion AmpliSeq™ custom panel (Life Technologies) was designed using the online designer ([www.ampliseq.com](http://www.ampliseq.com)). Multiplex PCRs were performed on DNA from each region of the relevant tumor according to the manufacturer's protocol. Barcoded sequencing libraries were constructed, which were sequenced with 200 bp read length on the Ion Torrent PGM™ sequencer (Life Technologies). For each tumor, a comprehensive cancer gene panel targeting 409 cancer-related genes (Life Technologies) was also used for sequencing on the Ion Torrent PGM™ sequencer by Life Technologies (Beverly, MA & South San Francisco, CA USA). Sequence alignment to target regions from the hg19 genome was performed using the IonTorrent TorrentSuite™ software. Variant allele frequencies (VAFs) for each variant position having a phred score  $>20$  were determined. A variant was considered absent when VAF  $< 1\%$  while having a read coverage  $\geq 50x$  or considered a germ-line variant when VAF  $> 1\%$  in the germ-line. In total 108 mutations were absent in all tumor regions or identified as germ-line variants (validation rate 94.6%) and were removed from further analysis. Variants with read coverage  $<50x$  were considered inconclusive and regional distribution was extracted from exome or genome sequencing data. A total of 1,884 nonsilent and 76,129 silent mutations from all methodologies were included in the analyses.

### Mutation clustering

Subclonal clusters of mutations were identified using a previously described Dirichlet process, implemented using a Markov Chain Monte Carlo (MCMC) method (18, 22). From the MCMC assignment of mutations to clusters, the most likely configuration of clusters and node assignments was obtained using a stepwise, greedy expectation-maximization (EM) algorithm that alternately added a node and shuffled mutations between nodes until no further improvement in the agreement with the posterior distribution from the MCMC sampling could be made. The best set of clusters was then chosen using the Bayesian information criterion (49). Clusters containing less than 1% of the mutations identified in a tumor were excluded from further analysis.

### Phylogenetic tree analysis

The subclonal architecture of each tumor was used to construct phylogenetic trees, with ubiquitous clonal mutations representing the most recent common ancestor (trunk) and heterogeneous mutations reflecting later (branch) events. The phylogenetic relationships between tumor regions (and where relevant, subclones) was inferred using both the Maximum Parsimony and the Unweighted Pair Group Methods (UPGMA) as implemented in the MEGA5 package (50). In both cases, for each tumor, all identified nonsilent and silent mutations were used as input. In cases where a given tumor region revealed considerable subclonal diversity, this region was divided into a major and a minor subclone based on the variant allele frequencies, prior to phylogenetic tree reconstruction, as previously described (27). In addition, in cases where there was evidence for ubiquitous mutations becoming heterogeneous due to regional copy number losses (Fig S4), mutations were considered ubiquitous prior to tree reconstruction.

Maximum parsimony trees were inferred using the max-mini branch-and-bound algorithm (51) calculating branch lengths with the average pathway method. The germline sample was designated as the outgroup, and, in the event of multiple optimal topologies, a consensus tree was constructed by collapsing branches reproduced in less than 50% of the trees. For the UPGMA trees, the evolutionary distances were calculated using the number of differences between regions, and uncertainty assessed by a bootstrap test (1000 replicates). Trees are drawn to scale, with branch lengths in the same units as those of the evolutionary distances used to infer the phylogenetic tree, and the percentage of replicate trees in which regions clustered together in the bootstrap test shown next to the branches. For samples with only two branches (WGS L002 and L008) a straightforward representation is provided with the trunk and branch lengths proportional to the number of variants, as previously described (28).

### Identification and classification of driver mutations

All identified nonsilent mutations were compared with lists of potential driver genes in NSCLC, containing all genes identified as frequently mutated by large-scale lung cancer sequencing studies (5, 9, 19, 52) or large-scale pan-cancer analyses (20, 53) using  $q < 0.05$  as cut-off, or present in the COSMIC cancer gene census (downloaded February 2013). Genes with a nonsilent mutation identified in our tumors by M-seq that were present in one of these lists, were analyzed in more detail using COSMIC (release v67) to determine whether the amino acid substitution has been previously identified. In addition,

when available, functional prediction scores (SIFT, Polyphen2, LRT and MutationTaster) implemented with dbNSFP (44) were used and a mutation was scored as ‘deleterious’ when at least two out of the four predictors classified the mutation as deleterious. We then classified all nonsilent mutations into 4 categories. Category 1 ‘high confidence driver mutations’ contained all disrupting mutations (nonsense, frameshift, splicing or ‘deleterious’ missense) in tumor suppressor genes or activating amino acid substitutions in oncogenes as described in the literature. Category 2 ‘putative driver mutations’ contained all other amino acid substitutions located at the same position or up to 5 amino acids away from a substitution present in COSMIC. Category 3 ‘low confidence driver mutations’ contained all other nonsilent mutations in genes that were present in the lists of cancer-related genes described above. Category 4 ‘unknown significance’ contained the remaining nonsilent mutations.

### Copy number analysis

Relative copy number was estimated from whole-exome sequencing data using VarScan2 (v2.2.11) (39) with default parameters, excluding the sex chromosomes and low mappability regions (ENCODE 'DAC blacklisted' regions) and adjusting for GC-content. To identify genomic segments of constant copy number, logR values were quantile normalized, winsorized using the Median Absolute Deviation, and jointly segmented at the patient level ( $\gamma = 1000$ ) (54). Absolute (integer) copy numbers were derived from relative copy numbers using ABSOLUTE (v1.0.6) (7). SNVs with  $\geq 50x$  sequencing coverage were included in the analysis and AmpliSeq derived VAFs were used where possible. Minimum/maximum ploidy was set to within  $\pm 0.5$  of the prior ploidy estimate, calculated from the sample's FACS-based DNA-index. Subsequently, the top 5 ABSOLUTE models (ranked by log-likelihood) were retrieved for each exome, and a set of inter-sample models was identified that minimized the total pairwise distance derived from the segments' expected modal copy-number, whilst maximizing the model's posterior log likelihood. Final model solutions were manually reviewed as recommended (7). Finally, adjacent segments of equal clonality and absolute copy-number were merged, and annotated with recurrent copy-number changes referenced in the TCGA Copy Number Portal (<http://www.broadinstitute.org/tcga/home>). Gains and losses for each tumor region were defined relative to ploidy for that region. Gain and loss segments had to overlap with  $>75\%$  of a TCGA recurrent amplified/lost region to be classified as a putative driver gain/loss.

For M-seq WGS regions ASCAT was used for allele specific copy number estimation (21). Subclonal copy number analysis was performed using the Battenberg algorithm and was used as the input for the mutation clustering (22).

Hierarchical clustering of copy number profiles was performed at cytoband resolution using the hclust function in R, based on euclidean distances. Cytoband coordinates were retrieved from the UCSC Genome Browser database (<http://genome.ucsc.edu/>)

### Large-scale structural variations

Inter- and intra-chromosomal translocations, inversions, and large ( $\geq 10$  kb) insertions/deletions were identified in WGS data using CREST (v1.0.1) (55) on tumor

regions jointly, after pre-processing BAMs with the GATK IndelRealigner (v2.1-13-g1706365). To reduce the false positive rate, breakpoint junctions of putative structural variants were de novo assembled using TIGRA (v0.3.7) (56) in germline and tumor BAMs individually, and aligned to hg19 using BLAT (v35) (57); breakpoints that were re-constituted from tumor BAMs only were considered valid. Furthermore, structural variants (SVs) with breakpoints mapping to low-copy repeats (i.e. UCSC genomicSuperDups track) were removed. Breakpoints were annotated with gene information, presence of nearby (<100 bp) polymorphic SV breakpoints (2013-07-23, <http://dgv.tcag.ca/dgv/app/home>) and high-copy repeat content (RepBase v17.03) using ANNOVAR. Breakpoint mechanism classification was attempted according to the criteria defined in Yang *et al.* (58) with additional strict manual review. In order to assign SVs to specific tumor regions, soft-clipped and discordant paired-end reads consistent with each SV in each tumor region were identified; an SV was called present if at least one of these read-level events was identified. All results were plotted using Circos (59).

For the breakpoint clustering analysis, structural variant breakpoints (nodes) within 10kb of one another were linked by edges representing both inter-breakpoint distance and chromosome. To simplify the network, nodes connected to fewer than 3 edges were omitted. Breakpoint homology profiling as performed as previously described (23).

#### TCGA exome data sets

TCGA LUAD and LUSC exome data sets were obtained from:

<https://confluence.broadinstitute.org/display/GDAC/DCC+MAFs>. Mutations calls were further filtered by removing any mutations that did not pass the following filters: variant allele frequency, >0.01; sequencing depth at mutated base, >10; mutant reads, >6. For a number of LUSC samples a likely sequencing artefact was identified (C>A mutations at CCA sites, see below for detailed description). These samples were removed from further analysis. Only patient samples where SNP6.0 data was also available were utilized. In total 294 LUAD and 124 LUSC TCGA samples were used in the analysis.

#### Estimating the cancer cell fraction of TCGA mutations

For TCGA samples, the cancer cell fraction, defined as the proportion of cancer cells harbouring a given mutation, was estimated by integrating the wild-type and mutant allele counts, absolute major and minor copy numbers, and tumor purity estimates as previously described (60). In brief, for a given mutation we first calculated the observed mutation copy number,  $n_{mut}$ , describing the fraction of tumor cells carrying a given mutation multiplied by the number of chromosomal copies at that locus using the following formula:

$$n_{mut} = VAF \frac{1}{p} [pCN_t + CN_n(1-p)]$$

where  $VAF$  corresponds to the variant allele frequency at the mutated base, and  $p$ ,  $CN_t$ ,  $CN_n$  are respectively the tumor purity, the tumor locus specific copy number, and the normal locus specific copy number. We then calculated the expected mutation copy number,  $n_{chr}$ , using the  $VAF$  and assigning a mutation to one of the possible copy numbers using maximum likelihood. The cancer cell fraction of a given mutation was then calculated as  $n_{mut}/n_{chr}$  (i.e. the observed mutation copy number divided by the

expected mutation copy number if present in 100% of tumor cells). Confidence intervals were obtained by bootstrap resampling the wild-type and mutant reads at each mutated locus ( $n=10,000$ ). A mutation was classified as either clonal or subclonal based on the confidence interval of the mutation copy number. Any mutation whose mutation copy number upper 95% confidence did not overlap 1 was classified as subclonal, with all other mutations classified as clonal.

Integer major and minor copy numbers were estimated using SNP6.0 data, normalized with the aroma R package (61-63), and processed with OncoSNP (64). Tumor purity estimates were obtained using ASCAT (21).

#### Temporal dissection of mutations of M-seq tumors

For each M-seq tumor, we classified each mutation as ‘early’ or ‘late’ based on whether it was located on the trunk or branch of the phylogenetic tree, with all truncal mutations classified as ‘early’ and any branch mutation as ‘late’.

In cases where genome doubling was observed, mutation copy number estimates were used to time mutations relative to the doubling. Only regions with at least two copies of the major allele were used, whilst regions where the minor allele was equal to one were excluded as these could reflect mutations on the minor allele that occurred before doubling or mutations on one copy of the major allele occurring after doubling. Any mutations that had a ploidy  $\geq 2$  were considered to have occurred before doubling, and all ploidy of 1 mutations as after doubling. For tuncal dissection, mutations with a variant allele frequency less than 5% or less than 2 tumor reads were excluded. Temporal dissection of mutations occurring before and after genome doubling was performed independently for each tumor region. For L008, where whole-genome sequencing data was available, the consensus between the two regions was used. For L001, one region (R1) displayed considerably higher cellularity and was therefore used.

Chi-square tests were used to compare the mutation spectra of the six mutations types (C>A, C>G, C>T, T>A, T>C, T>G). To compare the relative frequency of specific mutation types a two-sided Fisher’s exact test was used. APOBEC enrichment was assessed as described below.

#### Temporal dissection of mutations in TCGA samples

For each single-region TCGA sample, it was not possible to construct phylogenetic trees as described above. We therefore classified mutations as early or late based on their clonal status and when possible we timed mutations relative to copy number events. In brief, for timing mutations relative to copy number events, we restricted our analysis to mutations occurring in regions with at least two copies of the major allele. For any such region, mutations at ploidy  $\geq 2$  were classified as ‘before event’ and any mutations with a ploidy of 1 were classified as ‘after event’. Combining this with our cancer cell fraction estimates (see above), all clonal mutations that were not classified as ‘after event’ were aggregated as ‘early’, whilst all subclonal or ‘after event’ mutations were aggregated as ‘late’. Significance in mutation spectra between ‘early’ and ‘late’ mutations were then compared using a paired t-test.



### Estimating smoking strand bias

Strand bias was calculated based on annotating each C>A mutation as to whether it fell on the transcribed or untranscribed strand in the UCSC hg19 gene track (available from <http://genome.ucsc.edu/cgi-bin/hgTables>). TCGA samples, grouped according to histology and smoking status, were considered in aggregate. Two-sided Fisher's exact tests were used to determine significance.

### Detecting an APOBEC mutation pattern

To detect an APOBEC mutation pattern the methods outlined by Roberts *et al.* (13) were adopted. In brief, the enrichment  $E_{TCW}$  relating to the strength of mutagenesis at the  $\underline{TCW}$  motif across the genome was calculated as follows:

$$E_{TCT} = \frac{\text{mutations}_{TCW} \times \text{context}_{CorG}}{\text{mutations}_{CorG} \times \text{context}_{TCW}}$$

where  $\text{mutations}_{TCW}$  is the number of mutated cytosines (and guanines) falling in a  $\underline{TCW}$  (or  $\underline{WGA}$ ) motif,  $\text{mutations}_{C(orG)}$  is the total number of mutated cytosines (or guanines),  $\text{context}_{TCW}$  is the total number of  $\underline{TCW}$  (or  $\underline{WGA}$ ) motifs within a 41-nucleotides region centered on the mutated cytosines (and guanines) and  $\text{context}_{C(orG)}$  is the total number of cytosines (or guanines) within the 41-nucleotides region centered on the mutated cytosines (or guanines). Only specific base substitutions were included ( $\underline{TCW}$  to  $\underline{TTW}$  or  $\underline{TGW}$ ,  $\underline{WGA}$  to  $\underline{WAA}$  or  $\underline{WCA}$ , C to T or G, and G to A or C). Over-representation of APOBEC signature mutations in each sample was determined using a two-sided Fisher's exact test comparing the ratio of the number of cytosine-to-thymine or cytosine-to-guanine substitutions and guanine-to-adenine or guanine-to-cytosine substitutions that occurred in and out of the APOBEC target motif ( $\underline{TCW}$  or  $\underline{WGA}$ ) to an analogous ratio for all cytosines and guanines that reside inside and outside of the  $\underline{TCW}$  or  $\underline{WGA}$  motif within 41-nucleotide region centered on the mutation cytosine (and guanine). P-values were corrected using Benjamin-Hochberg multiple testing correction, and a significance threshold of  $q < 0.05$  was used. For each sample, APOBEC mutation enrichment was determined for all mutations, 'early' mutations and 'late' mutations separately. When temporally dissecting APOBEC mutation patterns in TCGA data, only samples with a significant APOBEC enrichment were used. Comparisons between early and late APOBEC mutation enrichment was performed using a paired t-test.

### Identifying a likely sequencing artefact signature in TCGA LUSC samples

To identify patients that exhibited an enrichment C<A mutations occurring within a CCA or TCG mutation context, we adapted the methods described above. Thus, we defined enrichment  $E_{CCAorTCG}$  as follows:

$$E_{CCAorTCG} = \frac{\text{mutations}_{CCAorTCG} \times \text{context}_{CorG}}{\text{mutations}_{CorG} \times \text{context}_{CCAorTCG}}$$

where  $\text{mutations}_{CCAorTCG}$  is the number of mutated cytosines-to-adenine (and guanine-to-thymidine) falling in a  $\underline{CCA}$  (or  $\underline{TGG}$ ) or  $\underline{TCG}$  (or  $\underline{CGA}$ ) motif,  $\text{mutations}_{C(orG)}$  is the total number of mutated cytosines-to-adenine (or guanine-to-thymidine),  $\text{context}_{CCAorTCG}$  is the total number of  $\underline{CCA}$  (or  $\underline{TGG}$ ) or  $\underline{TCG}$  (or  $\underline{CGA}$ ) motifs within a

41-nucleotides region centered on the mutated cytosines (and guanines) and context<sub>C</sub> (or G) is the total number of cytosines (or guanines) within the 41-nucleotides region centered on the mutated cytosines (or guanines). Only specific base substitutions involving C>A were considered.

Over-representation of CCA mutations in each sample was determined using a two-sided Fisher's exact test comparing the ratio of the number of cytosine-to-adenine and guanine-to-thymidine substitutions that occurred in and out of the target motif (CCA or TGG) to an analogous ratio for all cytosines and guanines that reside inside and outside of the CCA or TGG motif within 41-nucleotide region centered on the mutation cytosine (and guanine). P-values were corrected using Benjamin-Hochberg multiple testing correction, and a significance threshold of  $q < 0.05$  was used.

A specific sequencing plate (9898) was found to show highly significant enrichment of CCA mutations ( $P < 0.001$ ). Any samples sequenced on this plate as well as any samples showing CCA enrichment were therefore removed from further analysis. In total, 28 samples were removed.

#### Fluorescent In Situ Hybridization analysis

A small section of snap-frozen tumor material was fixed o/n in 10% neutral buffered formalin and paraffin-embedded. Dual color FISH was carried out using 2 centromeric probes (CEP2 and CEP16 labeled with spectrum orange and spectrum green, respectively; Abbott Laboratories), selected on the basis of infrequent copy number alterations in the TCGA LUAD and LUSC dataset for these chromosomes (Fig 2A). Briefly, 5-micron sections were used. Following dewaxing and rehydration using ethanol gradients, slides were placed in SPoTLight Pretreatment buffer (Invitrogen) at 98°C for 15 minutes and washed. Digestion enzyme was added to each slide and incubated for 22 minutes at room temperature. Slides were washed and dehydrated. 1.5µL of each centromeric probe was mixed with 10 µL hybridization buffer, denatured for 5 minutes at 95°C and placed on each dehydrated section. Slides were incubated overnight at 37°C in a moisturized chamber. After washing with 0.5x SSC at 75°C, slides were stained and mounted using Vectashield mounting media with DAPI (Vector Labs). Slides were scanned and images were captured using a 40x objective on the Applied Imaging Ariol System (Applied Imaging), with seven 0.5-mm z-stacks. For each region, sixty nuclei were scored manually in an unbiased manner.

#### APOBEC3B mRNA analysis by qRT-PCR

Total RNA was isolated from tumor regions of which fresh frozen material was available (L001, L002, L003, L004 and L011), using the AllPrep DNA/RNA kit from Qiagen according to the manufacturer's instruction, and used to synthesize cDNA. The cDNA was then amplified using APOBEC3B Taqman Assay or Taqman Assays for the housekeeping gene TBP (Applied Biosystems) on a 7500 FAST Real Time PCR machine (Applied Biosystems). APOBEC3B expression was normalised towards TBP, and the fold-change in expression was determined against the expression in the adjacent normal lung.

## Supplementary Figures

Figure S1

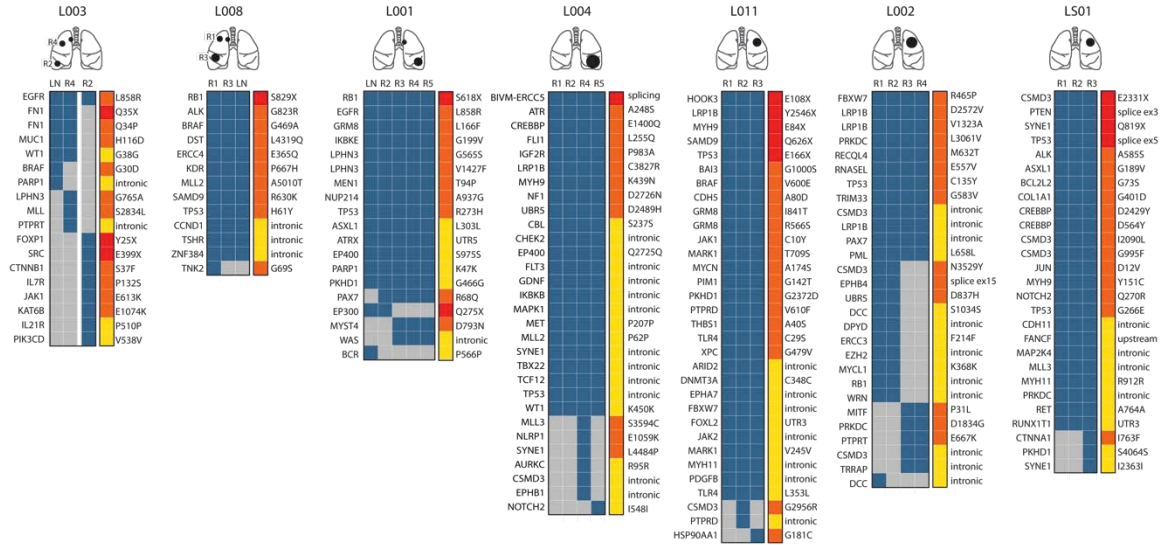

**Fig. S1.**

Intratumor heterogeneity of somatic mutations detected by a comprehensive cancer gene panel. Heatmaps show the regional distribution of all point mutations detected by sequencing a panel of 409 cancer-related genes. Presence (blue) or absence (grey) is indicated for each mutation per tumor region. The right column displays the severity of each mutation; nonsense or splice site (red), missense (orange) or silent (yellow). Cartoons above each heatmap depict the location of each tumor in the lung.

Figure S2

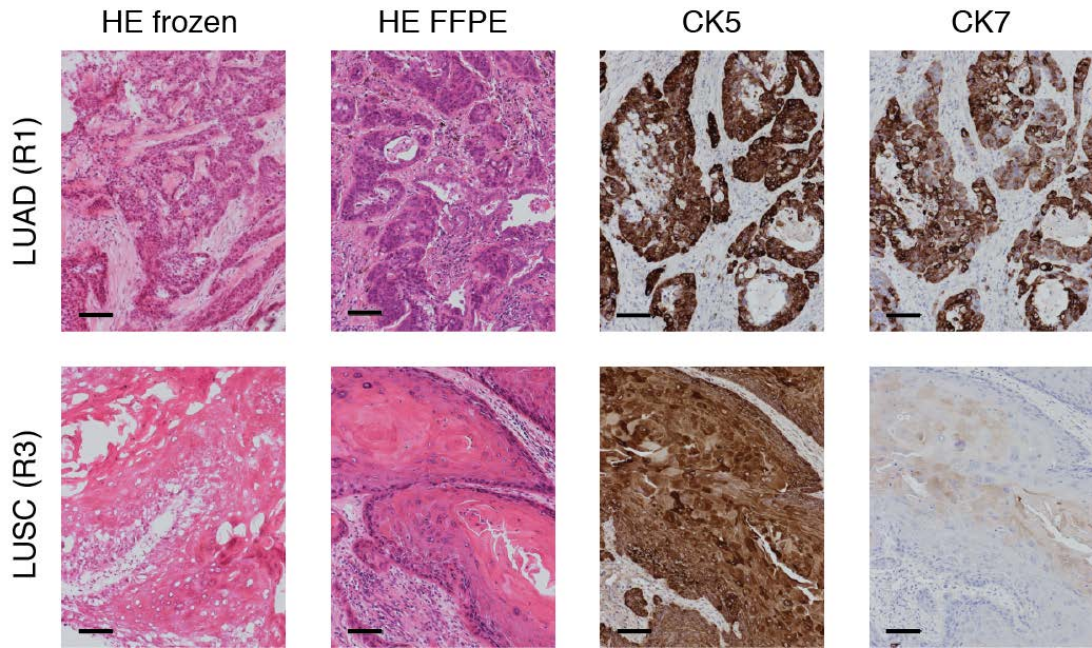

**Fig. S2**

L002 histopathology staining. Sections from LUAD (upper) or LUSC (lower) regions are shown. Left section is taken from frozen material adjacent to material used for DNA extraction for sequencing. The remaining sections are taken from FFPE representing LUAD or LUSC tumor regions and stained with Hematoxylin and Eosin or with an antibody detecting CK5 or CK7, as indicated. Scale bars, 100  $\mu$ m.

Figure S3

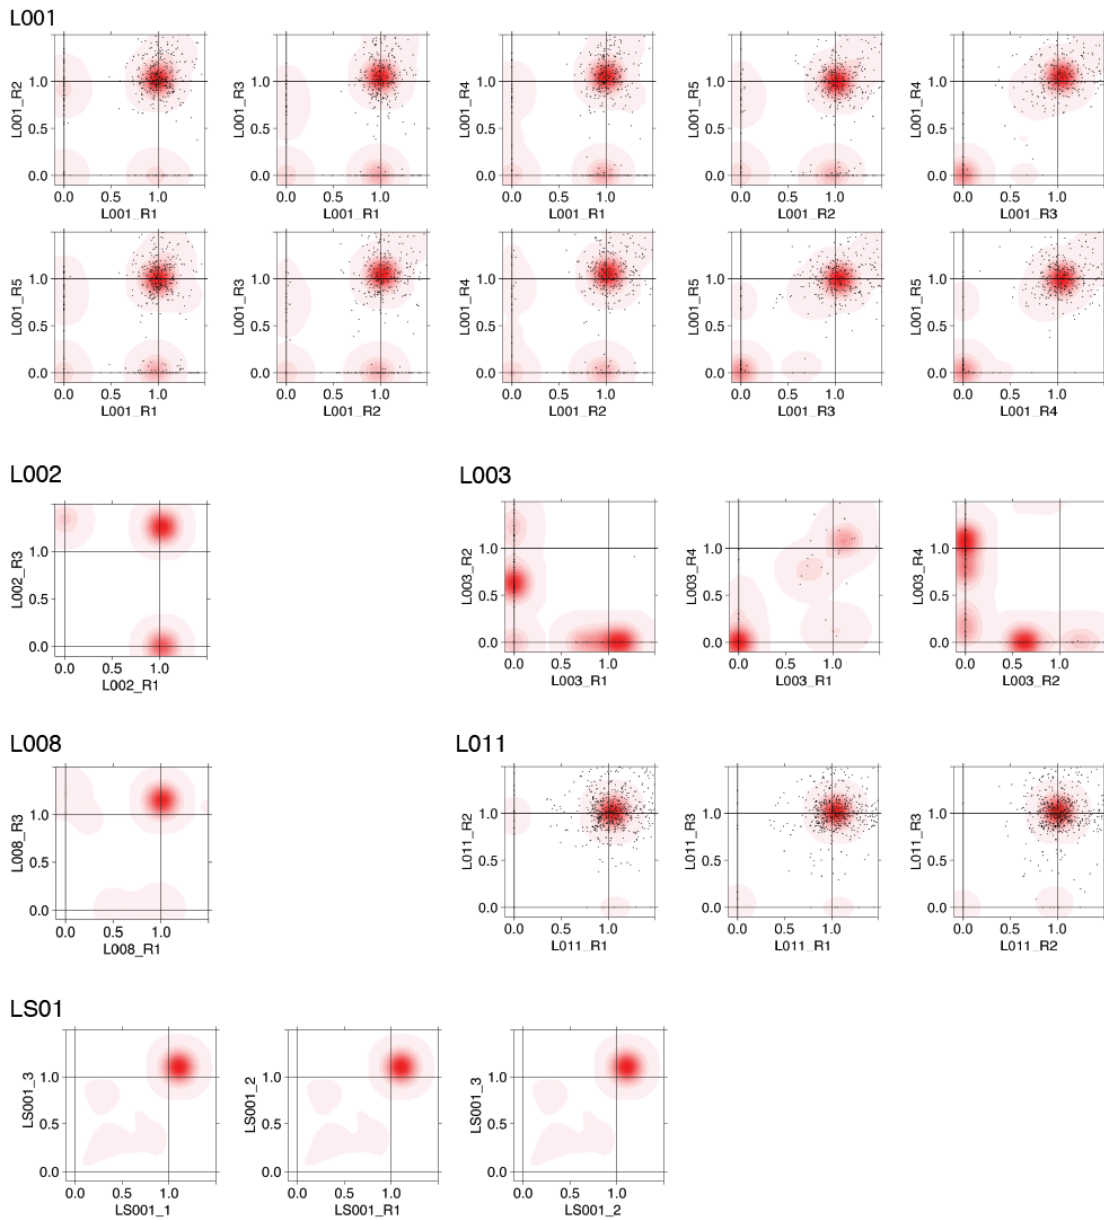

**Fig. S3**

Clonal architecture of NSCLC tumors. 2D-dirichlet plots show the cancer cell fraction of the mutations in regions of each NSCLC tumor; increasing intensity of red indicates the location of a high posterior probability of a cluster. For the M-seq WES tumors, identified mutations are indicated in black dots. L004 is presented in Fig.1B.

Figure S4

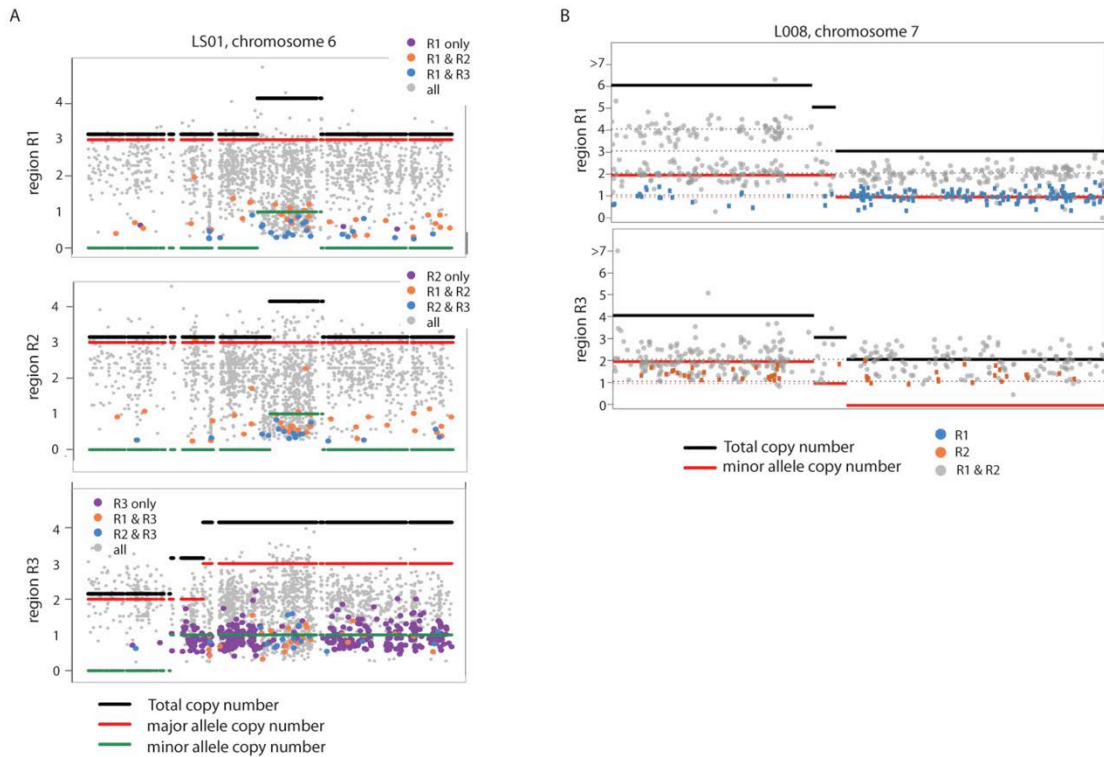

**Fig. S4**

Copy number events leading to mutational heterogeneity.

**A)** In LS01, loss of one allele of chromosome 6 in regions R1 and R2 results in private mutations in R3, creating mutational intra-tumor heterogeneity. Total copy number is shown with a black line, major allele copy number with a red line and minor allele copy number with a green line. Shared and private mutations are indicated in blue, orange, purple and grey.

**B)** Loss of one allele of chromosome 7q specifically in region R3 of L008 also results in loss of mutations carried on the allele, creating mutational diversity between regions R1 and R3. Total copy number is shown with a black line and the minor allele copy number with a red line. Mutations only detected in region R1 are depicted in blue, mutations only detected region R3 are depicted in orange, with shared mutations in grey.

Figure S5

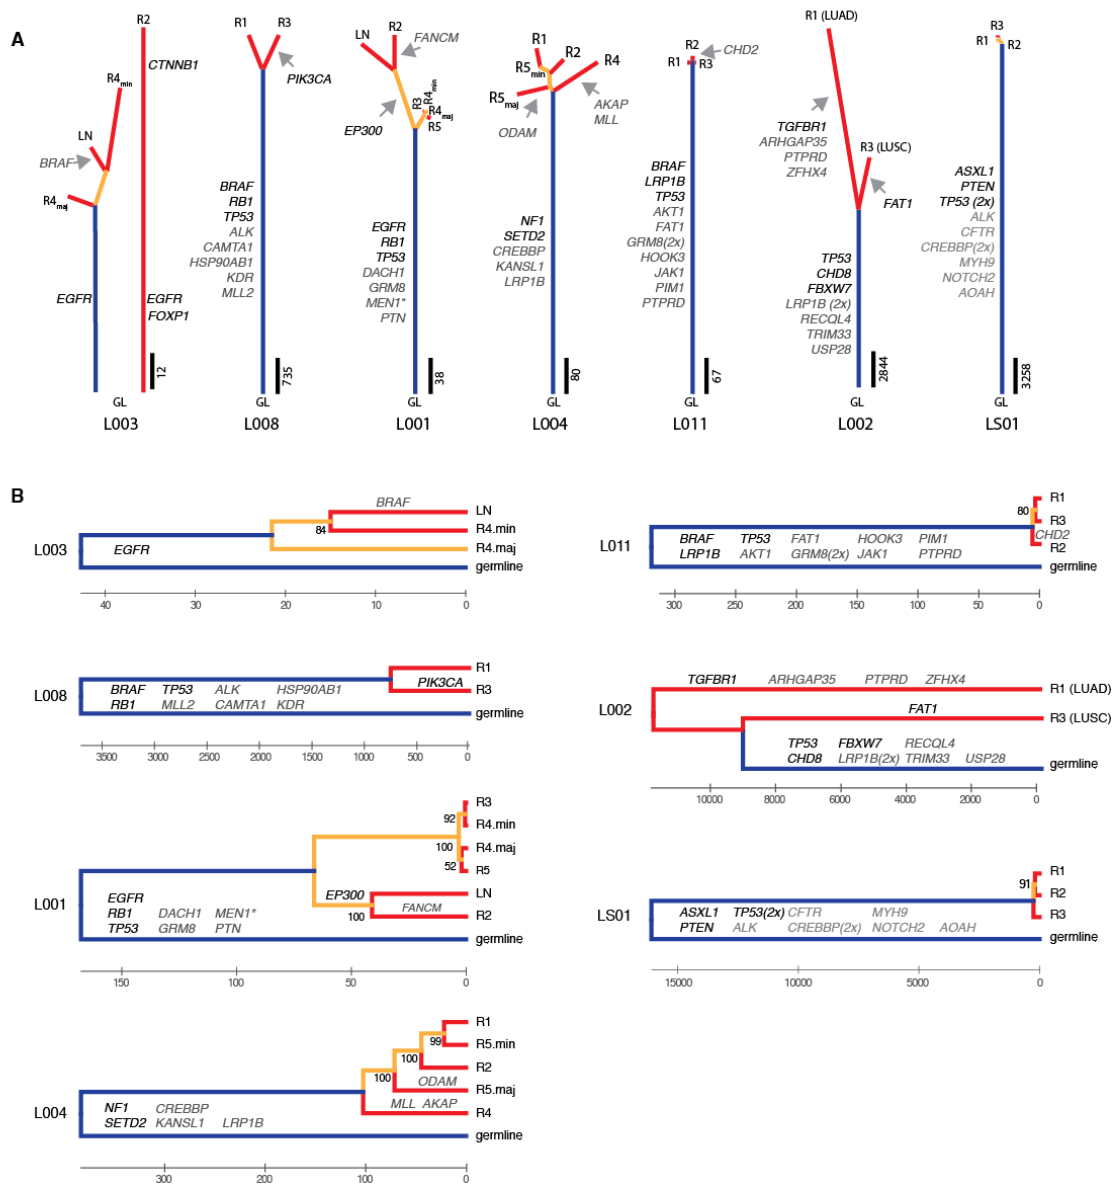

**Fig. S5.**

A) Phylogenetic trees generated by a maximum parsimony approach based on the distribution of all detected mutations. Scale is indicated for each sample next to the trunk with the number of mutations; trunk and branch lengths are proportional to the number of mutations acquired. GL indicates germ-line. Trees of L002, L008 and LS01 are based on M-seq WGS data. Categories 1 and 2 driver mutations are indicated next to the trunk or with an arrow pointing to the branches where they were acquired.

B) Dendrograms were inferred using the UPGMA method. The dendrograms are presented to scale, with the number of mutations as evolutionary distance. Uncertainties assessed by bootstrap tests are indicated next to the nodes. Categories 1 and 2 driver mutations are indicated above the trunk or branch where they were acquired.

Figure S6

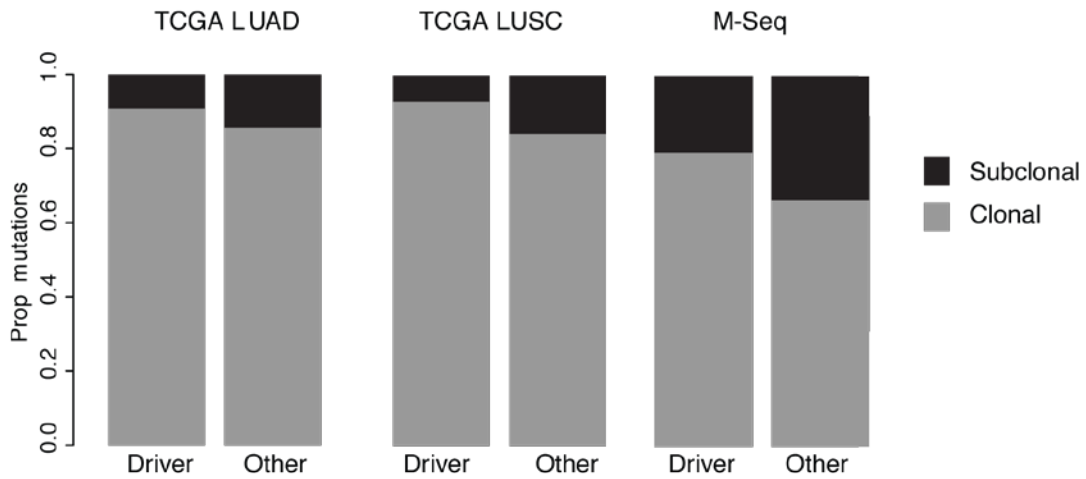

**Fig. S6.**

Clonality of driver and non-driver mutations in TCGA LUAD and LUSC tumors as well as M-seq samples. Driver genes are significantly more often clonally mutated compared to non-driver genes. For TCGA samples, driver gene status is based on (1-3). For M-seq tumors, category 1-2 drivers are displayed (16).



Figure S7

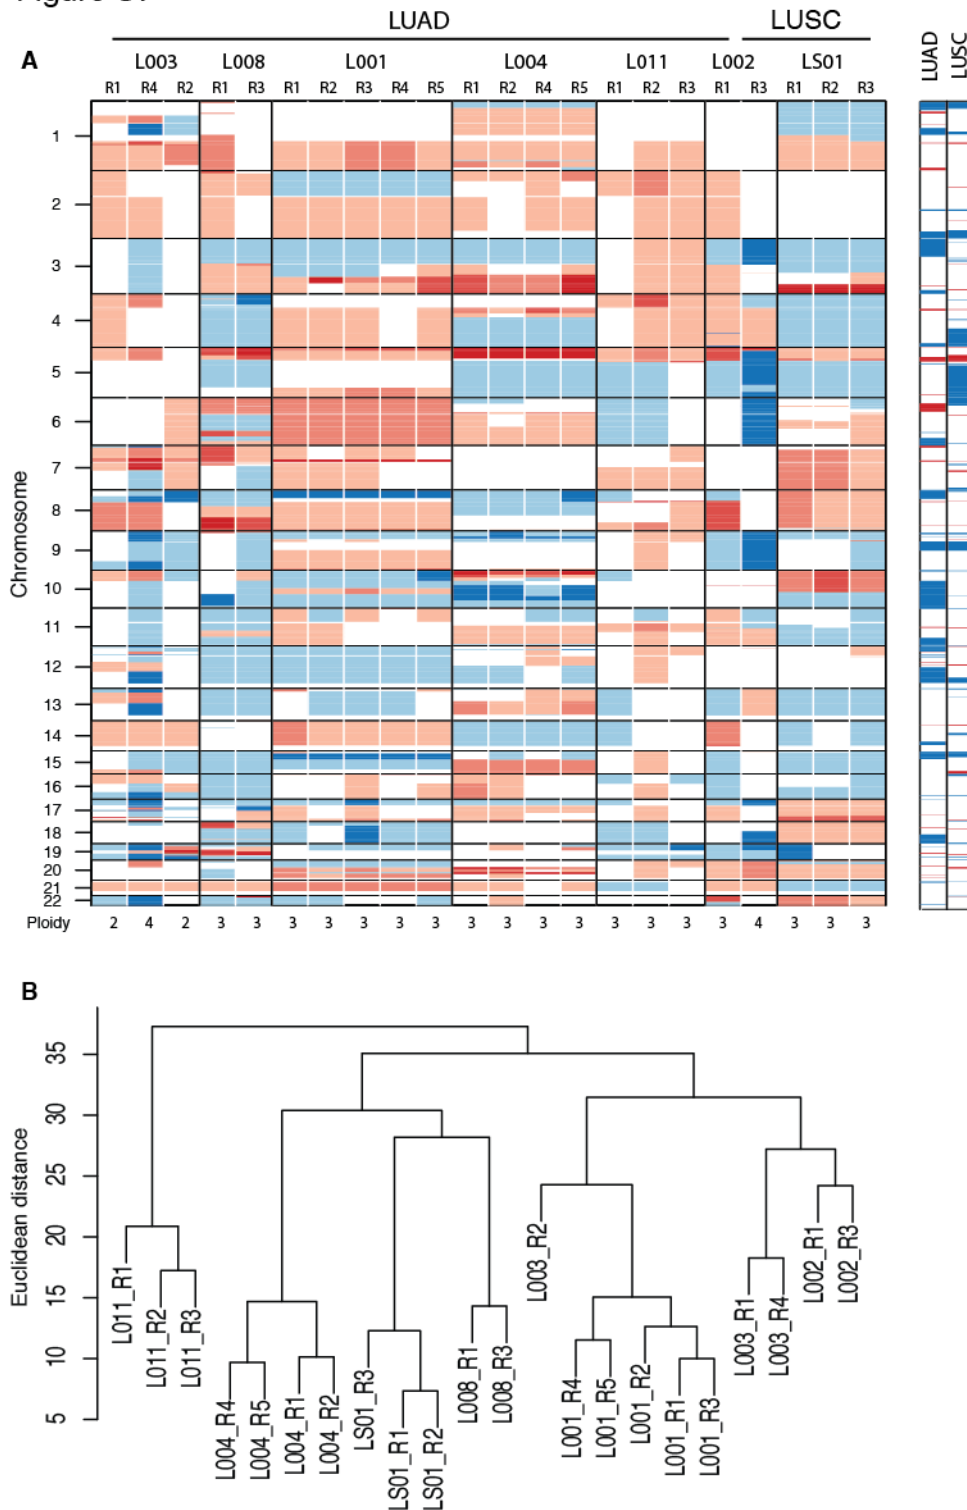

**Fig. S7.**

**A)** Copy number states across the genome for every tumor region. Losses (blue) and gains (red) are depicted relative to mean ploidy of the tumor region, with darker colors representing increased deviations from ploidy. Mean ploidy of each tumor region is

shown at the bottom of the plot. On right, recurrent gains (red) and losses (blue) are shown for TCGA LUAD and LUSC samples.

**B)** Hierarchical clustering of copy number profiles at cytoband resolution, using Euclidian distance. Copy number profiles of tumor regions from the same patient clearly cluster together, with the exception of L003, for which two clonally distinct tumors were observed.

Figure S8

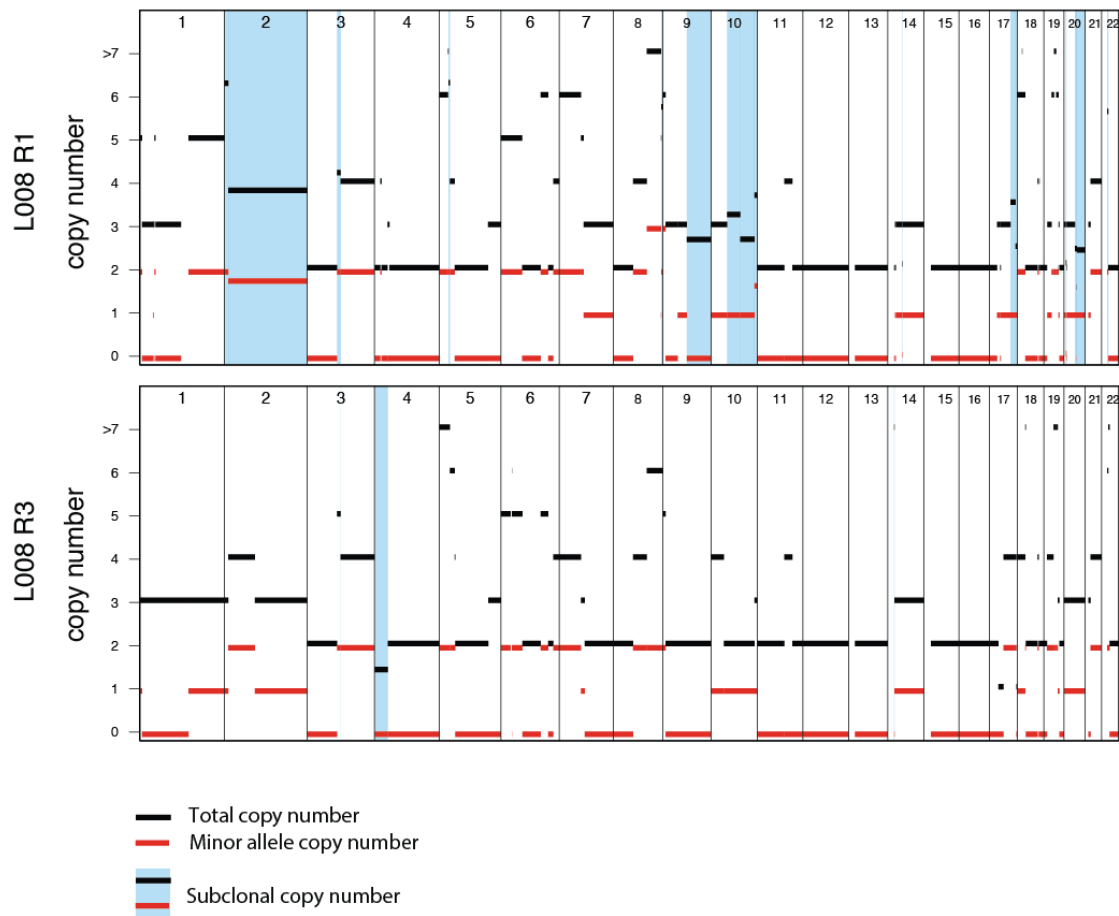

**Fig. S8.**

Copy number profile of L008. Chromosomal segments with subclonal copy number aberrations are highlighted in blue.

Figure S9

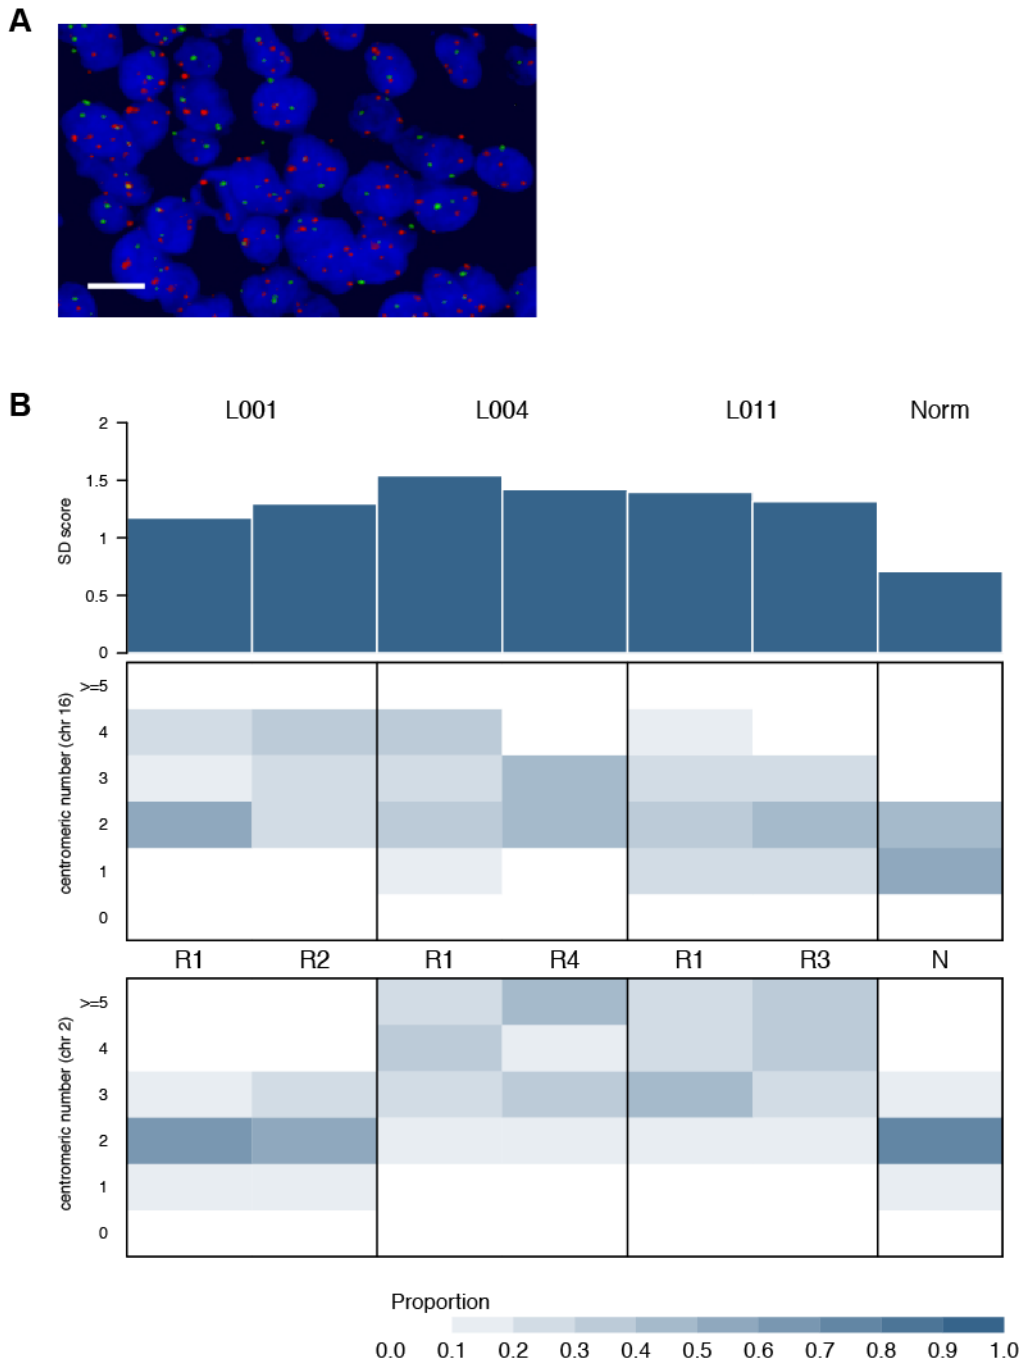

**Fig. S9.** Centromeric FISH for M-seq tumors. **A)** Centromeric FISH for L004 region R4. Centromeric probes for chromosome 2 are shown in red, and for chromosome 16 in green. Scale bar, 10 $\mu$ m. **B)** The top panel shows the Shannon diversity index for each tumor region. The bottom panels show the proportion of different centromeric counts observed for chromosomes 2 and 16.

Figure S10

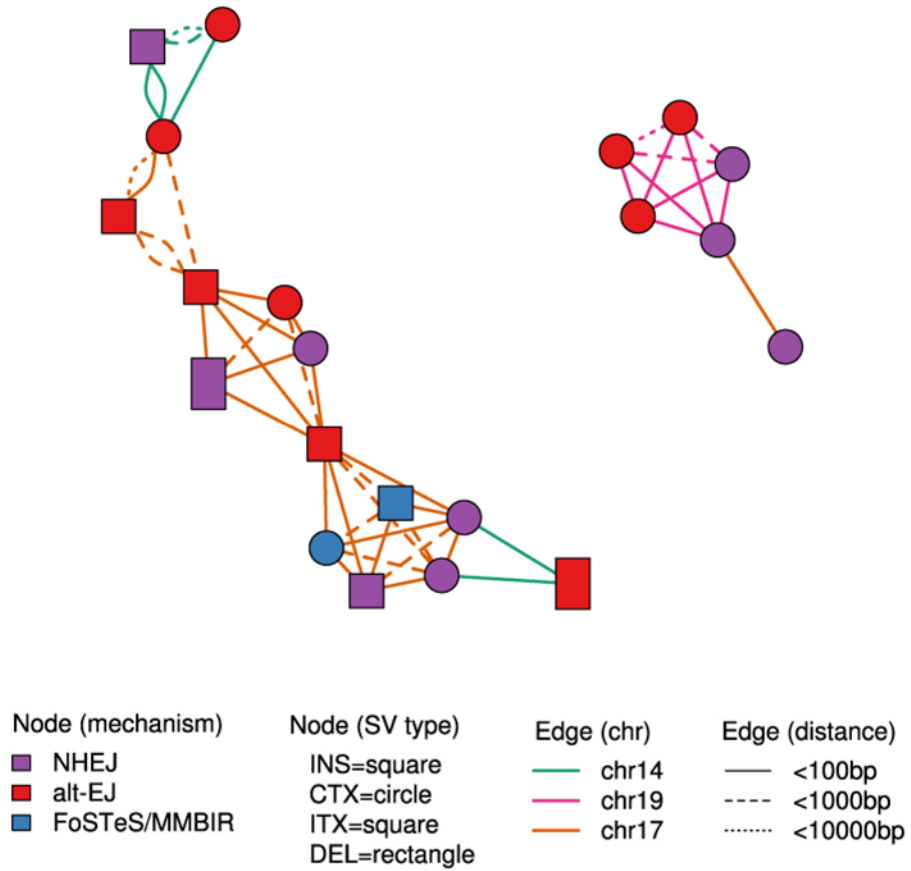

**Fig. S10.**

Structural variant breakpoints (nodes) within 10kb of one another are linked by edges representing both inter-breakpoint distance (line type) and chromosome (line color). Breakpoint homology profiling indicates that these highly localised breakpoint clusters involved either nonhomologous end-joining (purple) or alternative end-joining (red), indicative of double-strand break events, and are concentrated on chr17 (brown line) and chr19 (pink line).

Figure S11

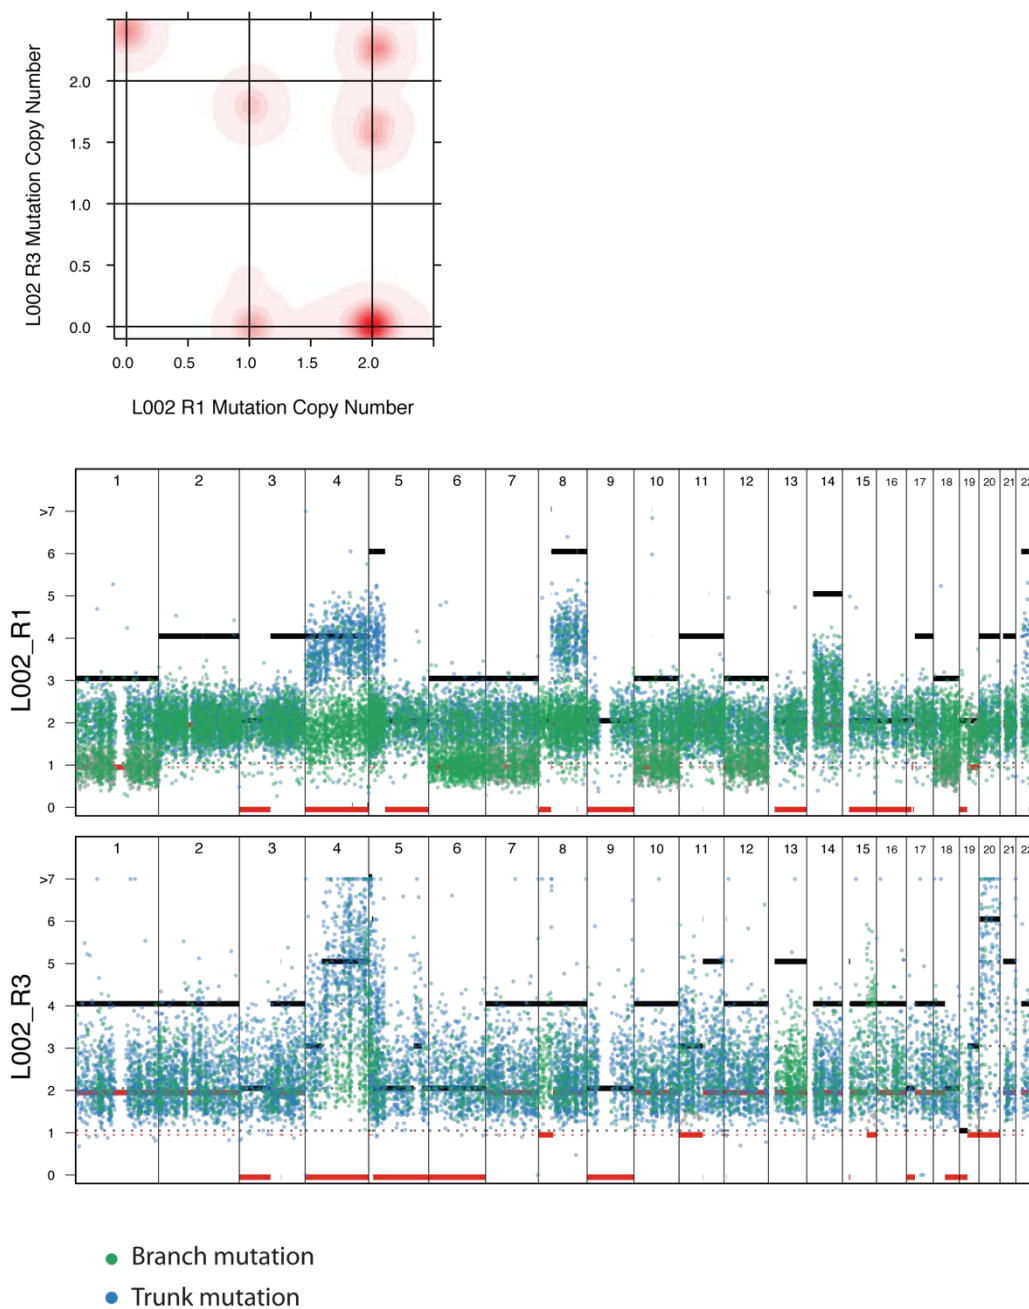

**Fig. S11.**

2D-dirichlet process plot (upper) using mutation copy numbers; increasing intensity of red indicates the location of a high posterior probability of a cluster. Private mutations clustered at a copy number 2 are observed in both regions R1 and R3, suggesting two independent genome-doubling events. Copy number profiles of L002 regions R1 and R3 (lower). Trunk mutations are showed in blue, whilst private mutations are depicted in green. Total copy number is depicted as a black line, with minor allele as a red line.

Figure S12

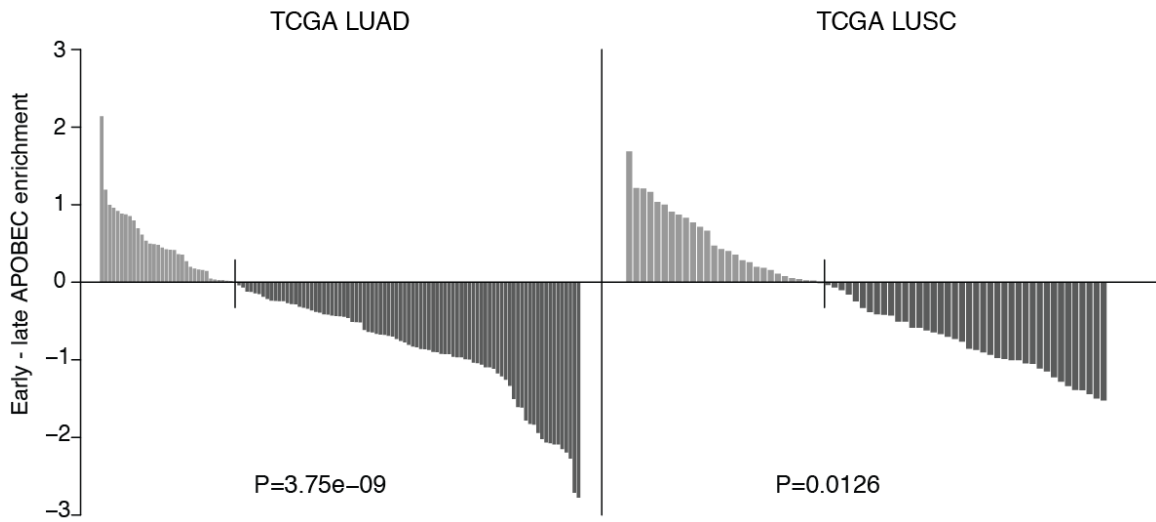

**Fig. S12.**

Rainfall plot showing difference in early and late APOBEC mutation enrichment for TCGA LUAD and TCGA LUSC. Each bar represents one TCGA tumour and its height corresponds to the difference in early versus late APOBEC enrichment. Only samples with significant APOBEC enrichment as well harbouring both early and late mutations are shown.

Figure S13

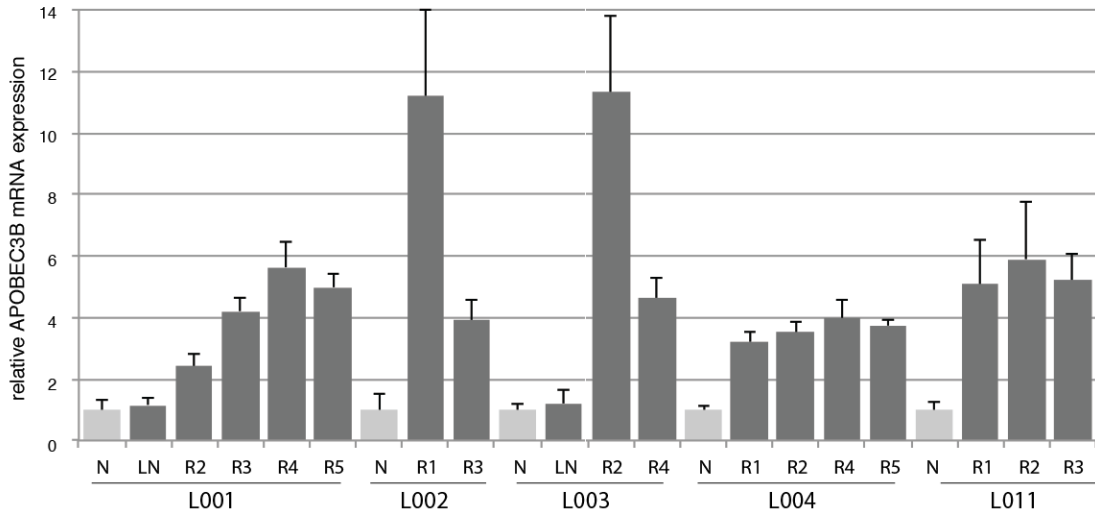

**Fig. S13.**

Graph showing APOBEC3B mRNA expression in tumor regions relative to the adjacent normal lung for each tumor, using TBP mRNA expression for normalization.



Figure S14

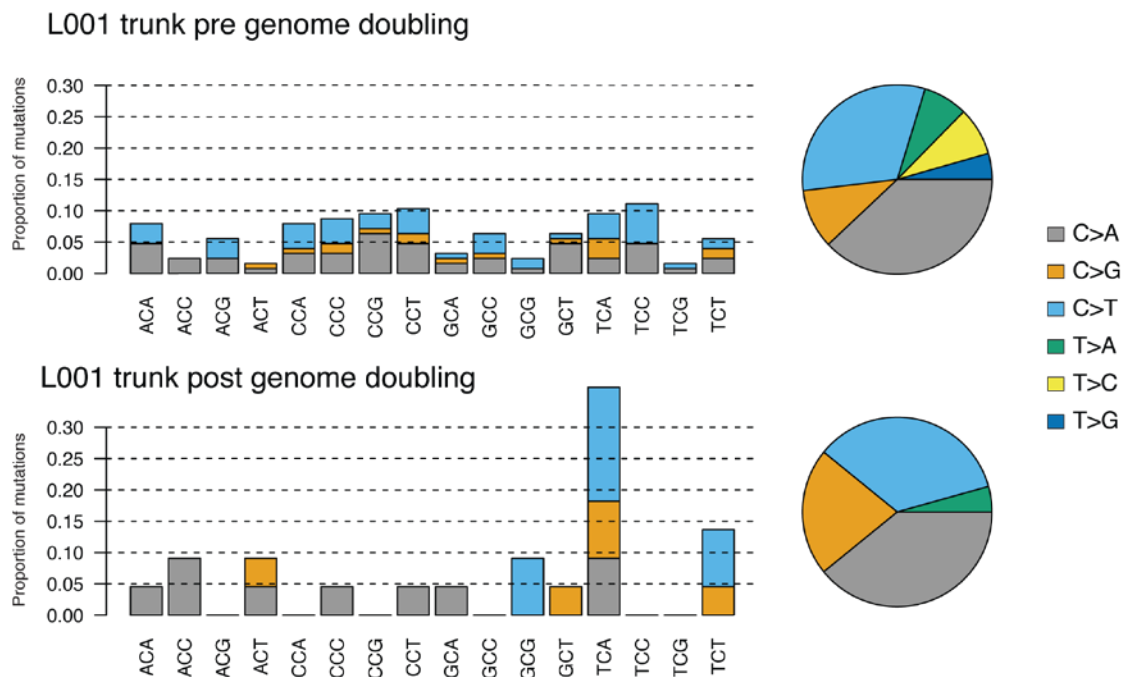

**Fig. S14.**

Truncal mutations pre and post genome doubling in L001. Stacked bar-charts (left) and pie charts (right) showing prevalence of different mutation types for truncal mutations occurring before and after genome doubling in L001.

## Supplementary tables

**Table S1.**

Detailed patient characteristics.

| Patient ID               | Age (years) | Gender | Histology     | Tumour Location /Max Diameter (mm) | Lymph Node(s)/Location | Histological Stage | Stage (I-IV) | Regions Sequenced      | Smoking Status (Pack-Years <sup>*</sup> ) | Smoking Cessation (years) |
|--------------------------|-------------|--------|---------------|------------------------------------|------------------------|--------------------|--------------|------------------------|-------------------------------------------|---------------------------|
| <b>L003</b>              | 84          | F      | LUAD          | RLL/22 & RUL/25                    | 2/Station 4            | pT4N2M0            | IIIB         | R2 (RLL), R4 (RUL), LN | Never                                     | N/A                       |
| <b>L008</b>              | 75          | M      | LUAD          | RUL/15 & RML/24                    | 2/Hilar                | pT4N1M0            | IIIA         | R1 (RUL), R3 (RML), LN | Former (25)                               | 20                        |
| <b>L001</b> <sup>†</sup> | 59          | F      | LUAD          | LLL/30                             | 3/Hilar                | pT2aN1M0           | IIA          | R1-R5, LN              | Former (10)                               | 23                        |
| <b>L004</b> <sup>‡</sup> | 73          | M      | Undiff. NSCLC | LLL/100                            | none                   | pT3N0M0            | IIB          | R1-R4                  | Current (50)                              | N/A                       |
| <b>L011</b>              | 49          | F      | LUAD          | LUL/55                             | none                   | pT2aN0M0           | IB           | R1-R3                  | Current (45)                              | N/A                       |
| <b>L002</b>              | 78          | M      | LUAD/LUSC     | LUL/90                             | 2/Station 5            | pT3N2M0            | IIIA         | R1-R4                  | Current (>50)                             | N/A                       |
| <b>LS01</b>              | 69          | M      | LUSC          | LLL/38                             | none                   | pT2aN0M0           | IB           | R1-R3                  | Former (50)                               | Unknown                   |

Abbreviations: LLL, lower lobe; LUL, left upper lobe; RLL, right lower lobe; RUL, right upper lobe; RML, right middle lobe; R, region; LN, lymph node; Undiff, undifferentiated. \* a pack-year is defined as the number of packs of cigarettes smoked per day multiplied by the number of years the person has smoked. <sup>†</sup>L001 presented a synchronous MEN1 syndrome-associated tumor, classified as separate tumor based on histological morphology, biochemical profile and octreotide scan imaging. <sup>‡</sup>L004 presented a synchronous oesophageal adenocarcinoma, classified as separate primary tumors based on histological morphology and immunohistochemistry marker profile.

**Table S2.**

Detailed coverage information.

|             | Tumor       | Region | Coverage |        |
|-------------|-------------|--------|----------|--------|
|             |             |        | Mean     | Median |
| M-seq WES   | <b>L003</b> | B      | 131      | 103    |
|             |             | R1     | 103      | 76     |
|             |             | R2     | 100      | 77     |
|             |             | R4     | 107      | 76     |
|             | <b>L008</b> | B      | 111      | 87     |
|             |             | R1     | 106      | 78     |
|             |             | R3     | 91       | 72     |
|             |             | R5     | 102      | 79     |
|             | <b>L001</b> | N      | 57       | 44     |
|             |             | R1     | 99       | 72     |
|             |             | R2     | 119      | 87     |
|             |             | R3     | 67       | 49     |
|             |             | R4     | 115      | 86     |
|             |             | R5     | 131      | 96     |
|             | <b>L004</b> | B      | 60       | 47     |
|             |             | R1     | 108      | 76     |
|             |             | R2     | 188      | 140    |
|             |             | R4     | 100      | 76     |
|             |             | R5     | 174      | 129    |
|             | <b>L011</b> | B      | 99       | 78     |
| R1          |             | 92     | 70       |        |
| R2          |             | 95     | 73       |        |
| R3          |             | 92     | 70       |        |
| <b>L002</b> | B           | 132    | 121      |        |
|             | R1          | 91     | 70       |        |
|             | R2          | 94     | 74       |        |
|             | R3          | 148    | 117      |        |
|             | R4          | 95     | 74       |        |
| M-seq WGS   | <b>L008</b> | B      | 38       | 38     |
|             |             | R1     | 90       | 86     |
|             |             | R3     | 102      | 102    |
|             | <b>L002</b> | B      | 38       | 38     |
|             |             | R1     | 96       | 95     |
|             |             | R3     | 97       | 98     |
|             | <b>LS01</b> | B      | 20       | NA     |
|             |             | R1     | 22       | NA     |
|             |             | R2     | 17       | NA     |
|             |             | R3     | 24       | NA     |

**Table S3.**

Detailed information of candidate driver mutations

| Tumor | Gene     | Substitution |           | In Cosmic (v67) | Cancer-related gene |            |       | dbNSFP   | Tumor region | Driver Category |
|-------|----------|--------------|-----------|-----------------|---------------------|------------|-------|----------|--------------|-----------------|
|       |          | cDNA         | AA        |                 | NSCLC               | pan-cancer | TUSON |          |              |                 |
| Loo3  | CTNNB1   | C110T        | S37F      | YES             | x                   | x          | OG    | 4xD      | R2           | 1               |
|       | EGFR     | T2573G       | L858R     | YES             | x                   | x          | OG    | 4xD      | all          | 1               |
|       | FOXP1    | C75A         | Y25X      | STOP            |                     | x          |       | STOP     | R2           | 1               |
|       | BRAF     | G89A         | G30D      | YES             | x                   | x          | OG    | 1xD      | R1 (LN)      | 2               |
|       | IL7R     | C394T        | P132S     | 5aa             |                     | x          | -     | 4xD      | R2           | 3               |
|       | JAK1     | G1837A       | E613K     | 5aa             |                     | x          |       | oxD      | R2           | 3               |
|       | MUC1     | C346G        | H116D     | NO              |                     | x          |       | NA       | R1,R4        | 3               |
|       | MLL      | C8492T       | S2831L    | NO              |                     | x          |       | 4xD      | R4           | 3               |
| Loo8  | BRAF     | G1406C       | G469A     | YES             | x                   | x          | OG    | 4xD      | all          | 1               |
|       | PIK3CA   | G1624A       | E542K     | YES             | x                   | x          | OG    | 3xD      | R3           | 1               |
|       | RB1      | C2486G       | S829X     | YES             | x                   | x          | TS    | STOP     | all          | 1               |
|       | TP53     | C577T        | H193Y     | YES             | x                   | x          | TS    | 4xD      | all          | 1               |
|       | ALK      | G2467A       | G823R     | 5aa             |                     | x          | OG    | 4xD      | all          | 2               |
|       | CAMTA1   | A1481C       | Q494P     | 5aa             |                     | x          |       | 4xD      | all          | 2               |
|       | HSP90AB1 | C52T         | Q18X      | YES             |                     | x          |       | STOP     | all          | 2               |
|       | KDR      | C2000A       | P667H     | 5aa             | x                   | x          |       | 4xD      | all          | 2               |
|       | MLL2     | G15028A      | A5010T    | 5aa             | x                   | x          |       | NA       | all          | 2               |
|       | ERCC4    | G1093C       | E365Q     | 5aa             |                     | x          |       | 1xD      | all          | 3               |
|       | FANCM    | A2068G       | R690G     | NO              |                     |            | TS    | 1xD      | all          | 3               |
|       | FANCM    | A2152C       | N718H     | 5aa             |                     |            | TS    | 1xD      | all          | 3               |
|       | KANSL1   | C3260G       | P1087R    | 5aa             |                     |            | TS    | 1xD      | all          | 3               |
|       | MAGI2    | G1723A       | D575N     | 5aa             |                     |            | OG    | 2xD      | R3           | 3               |
| Loo1  | EGFR     | T2573G       | L858R     | YES             | x                   | x          | OG    | 4xD      | all          | 1               |
|       | EP300    | C823T        | Q275X     | STOP            |                     | x          | TS    | STOP     | LN, R2       | 1               |
|       | RB1      | C1853G       | S618X     | STOP            | x                   | x          | TS    | STOP     | all          | 1               |
|       | TP53     | G818A        | R273H     | YES             | x                   | x          | TS    | 3xD      | all          | 1               |
|       | DACH1    | C1389A       | S463R     | 5aa             | x                   |            | TS    | 3xD      | all          | 2               |
|       | FANCM    | G2578T       | E860X     | NO              |                     |            | TS    | STOP     | R2           | 2               |
|       | GRM8     | A498C        | L166F     | 5aa             | x                   |            |       | 4xD      | all          | 2               |
|       | MEN1     | A280C        | T94P      | 5aa             |                     | x          | TS    | 3xD      | all          | 2               |
|       | PTN      | G258T        | K86N      | YES             |                     |            | OG    | 4xD      | all          | 2               |
|       | ATP5B    | G1342A       | E448K     | 5aa             |                     | x          |       | 3xD      | all          | 3               |
|       | ELF4     | G964T        | A322S     | NO              |                     | x          |       | oxD      | R2           | 3               |
|       | NUP214   | C2810G       | SP exon21 | NO              |                     | x          |       | splicing | all          | 3               |
|       | PAX7     | G203A        | R68Q      | NO              |                     | x          |       | 4xD      | R2-5         | 3               |
|       | RBM10    | G970C        | A324P     | NO              | x                   |            | TS    | 1xD      | all          | 3               |
| Loo4  | NF1      | G8239A       | D2747N    | 5aa             | x                   | x          | TS    | 2xD      | all          | 1               |
|       | SETD2    | G5009C       | R1670T    | 5aa             | x                   | x          | TS    | 3xD      | all          | 1               |
|       | AKAP9    | G3589A       | E1197K    | 5aa             |                     | x          |       | 3xD      | R4           | 2               |
|       | CREBBP   | G4198C       | E1400Q    | YES*            |                     | x          | TS    | 2xD      | all          | 2               |
|       | KANSL1   | A2167T       | R723W     | 5aa             |                     |            | TS    | 4xD      | all          | 2               |
|       | LRP1B    | T11479C      | C3827R    | 5aa             | x                   |            |       | 4xD      | all          | 2               |
|       | MLL3     | C10781G      | S3594C    | 5aa             |                     | x          |       | 4xD      | R4           | 2               |
|       | ODAM     | G775T        | D259Y     | 5aa             |                     | x          |       | 3xD      | R5           | 2               |
|       | ANO3     | A58T         | S20C      | 5aa             |                     |            | TS    | 4xD      | all          | 3               |
|       | ATAD2    | A3394G       | T1132A    | NO              |                     |            | TS    | oxD      | all          | 3               |
|       | DNAH12   | G7181A       | W2394X    | STOP            |                     | x          |       | STOP     | R5           | 3               |
|       | EWSR1    | G1766A       | R589K     | YES*            |                     | x          |       | 1xD      | R5           | 3               |
|       | FLI1     | T863A        | L288Q     | 5aa             |                     | x          |       | NA       | all          | 3               |
|       | MYH9     | G1317C       | K439N     | 5aa             |                     | x          |       | 3xD      | all          | 3               |
|       | NCOA1    | G2494C       | E832Q     | 5aa             |                     | x          |       | oxD      | R4           | 3               |
|       | ODAM     | C268A        | Q90K      | NO              |                     | x          |       | oxD      | all          | 3               |
|       | TAF15    | A215G        | N72S      | NO              |                     | x          |       | oxD      | all          | 3               |
|       | TRIM23   | A772T        | I258F     | NO              |                     |            | OG    | 3xD      | all          | 3               |
| Loo11 | BRAF     | T1799A       | V600E     | YES             | x                   | x          | OG    | 3xD      | all          | 1               |
|       | LRP1B    | C7638G       | Y2546X    | 5aa             | x                   |            |       | STOP     | all          | 1               |
|       | TP53     | G892T        | E298X     | YES             | x                   | x          | TS    | STOP     | all          | 1               |
|       | AKT1     | G44C         | R15P      | 5aa             |                     | x          | OG    | 3xD      | all          | 2               |

|             |         |         |            |        |   |   |    |          |       |   |
|-------------|---------|---------|------------|--------|---|---|----|----------|-------|---|
|             | CHD2    | A3065T  | K1022M     | 5aa    |   |   | TS | 3xD      | R2    | 2 |
|             | FAT1    | T3320G  | L1107R     | 5aa    |   | x | TS | NA       | all   | 2 |
|             | GRM8    | T2522C  | I841T      | 5aa    | x |   |    | 4xD      | all   | 2 |
|             | GRM8    | C1696A  | R566S      | YES    | x |   |    | 2xD      | all   | 2 |
|             | HOOK3   | G322T   | E108X      | 5aa    |   | x |    | STOP     | all   | 2 |
|             | JAK1    | G29A    | C10Y       | 5aa    |   | x |    | 2xD      | all   | 2 |
|             | PIM1    | G142T   | G48C       | 5aa    |   | x |    | 4xD      | all   | 2 |
|             | PTPRD   | G3076T  | V1026F     | 5aa    | x |   |    | 4xD      | all   | 2 |
|             | CLTCL1  | G2914T  | D972Y      | 5aa    |   | x | -  | NA       | all   | 3 |
|             | MYCN    | G520T   | A174S      | NO     |   | x | OG | oxD      | all   | 3 |
|             | MYH9    | G250T   | E84X       | 5aa    |   | x |    | STOP     | all   | 3 |
|             | PLEKHA6 | G2854A  | E952K      | 5aa    |   |   | TS | 4xD      | all   | 3 |
|             | TBX3    | C1872A  | H624Q      | 5aa    |   |   | TS | 1xD      | all   | 3 |
|             | XPC     | G1325T  | G442V      | 5aa    |   | x |    | NA       | all   | 3 |
| <b>Loo2</b> | FAT1    | C76T    | R26X       | STOP   |   | x | TS | STOP     | R3,R4 | 1 |
|             | TGFBR1  | C1310G  | S437X      | STOP   | x |   |    | STOP     | R1,R2 | 1 |
|             | TP53    | G404A   | C135Y      | YES    | x | x | TS | 4xD      | all   | 1 |
|             | ARHGAP3 |         |            |        |   |   |    |          |       |   |
|             | 5       | G2915-  | R972fs*55  | FS     |   | x | TS | FS       | R1,R2 | 2 |
|             | CHD8    | G1232C  | G411A      | 5aa    |   | x | TS | NA       | all   | 2 |
|             | FBXW7   | G1394C  | R465P      | YES *  | x | x | TS | 4xD      | all   | 2 |
|             | LRP1B   | A7715T  | D2572V     | 5aa    | x |   |    | 3xD      | all   | 2 |
|             | LRP1B   | T3968C  | V1323A     | 5aa    | x |   |    | 2xD      | all   | 2 |
|             | PTPRD   | G1999A  | E667K      | 5aa    | x |   |    | 3xD      | R1,R2 | 2 |
|             | RECQL4  | T1895C  | M632T      | 5aa    |   | x |    | NA       | all   | 2 |
|             | TRIM33  | G1748T  | G583V      | 5aa    |   | x |    | 3xD      | all   | 2 |
|             | USP28   | A1971T  | SP exon 16 | splice |   |   | TS | splicing | all   | 2 |
|             | ZFHx4   | C6394A  | P2132T     | YES    | x |   |    | NA       | R1,R2 | 2 |
|             | ARHGAP5 | A38G    | Y13C       | NO     |   |   | TS | 3xD      | all   | 3 |
|             | HOXA11  | G688A   | E230K      | 5aa    |   | x |    | 1xD      | R1,R2 | 3 |
|             | KCNQ5   | G1247T  | SP exon 9  | splice |   |   | OG | splicing | all   | 3 |
|             | LIMCH1  | A333T   | R111S      | 5aa    |   |   | TS | 1xD      | all   | 3 |
|             | MBOAT2  | A498T   | L166F      | NO     |   |   | OG | 2xD      | R1,R2 | 3 |
|             | MGA     | C72G    | F24L       | 5aa    |   | x | TS | NA       | R3,R4 | 3 |
|             | MITF    | C92T    | P31L       | NO     |   | x |    | 2xD      | R3,R4 | 3 |
|             | NTRK1   | C47A    | A16D       | NO     | x | x |    | 1xD      | R1-3  | 3 |
|             | PRDM16  | C1967T  | P656L      | 5aa    |   | x |    | oxD      | R3,R4 | 3 |
|             | SMC3    | T2457G  | I819M      | 5aa    |   | x |    | 2xD      | R1-3  | 3 |
|             | SMO     | G385A   | V129I      | NO     |   | x |    | 2xD      | all   | 3 |
|             | WHSC1L1 | G1375A  | E459K      | NO     |   | x |    | 1xD      | R1,R2 | 3 |
|             | ZFHx4   | C8014A  | Q2672K     | 5aa    | x |   |    | NA       | all   | 3 |
|             | ZFHx4   | C5131A  | P1711T     | 5aa    | x |   |    | NA       | R1,R2 | 3 |
|             | ZFHx4   | G9271T  | G3091C     | 5aa    | x |   |    | NA       | R3,R4 | 3 |
|             | ZNF292  | A1436T  | Y479F      | NO     |   |   | TS | NA       | all   | 3 |
| <b>LS01</b> | ASXL1   | G566T   | G189V      | splice |   | x | TS | splicing | all   | 1 |
|             | PTEN    | G209+1A | SP exon3   | splice | x | x | TS | splicing | all   | 1 |
|             | TP53    | A97-2G  | SP exon 5  | splice | x | x | TS | splicing | all   | 1 |
|             | TP53    | G797A   | G266E      | YES    | x | x | TS | 4xD      | all   | 1 |
|             | ALK     | G1753T  | A585S      | YES *  | x | x | OG | 1xD      | all   | 2 |
|             | CFTR    | C1057A  | Q353K      | 5aa    | x |   |    | NA       | all   | 2 |
|             | CREBBP  | G7285T  | D2429Y     | YES    |   | x | TS | 3xD      | all   | 2 |
|             | CREBBP  | G1690T  | D564Y      | 5aa    |   | x | TS | 4xD      | all   | 2 |
|             | MYH9    | A452G   | Y151C      | YES    |   | x |    | 4xD      | all   | 2 |
|             | NOTCH2  | A809G   | Q270R      | 5aa    |   | x | TS | 1xD      | all   | 2 |
|             | AOAH    | T688A   | C230S      | 5aa    |   |   | TS | NA       | all   | 3 |
|             | ASXL2   | G1448A  | C483Y      | NO     |   | x | TS | NA       | all   | 3 |
|             | COL1A1  | G1202A  | G401D      | splice |   | x |    | splicing | all   | 3 |
|             | ETV6    | G206T   | W69L       | 5aa    |   | x |    | NA       | all   | 3 |
|             | JUN     | A35T    | D12V       | 5aa    |   | x |    | 3xD      | all   | 3 |
|             | MLL     | A1699C  | T567P      | NO     |   | x |    | NA       | R3    | 3 |
|             | MLL3    | C4209G  | F1403L     | NO     |   | x |    | NA       | R3    | 3 |

Abbreviations: AA, amino acid; subst, substitution; FS, frameshift; 5aa, within 5 amino acids; Cat, category driver mutation; SP, splicing; \*different substitution in COSMIC database v67. x indicates that gene is

identified as potential driver gene in NSCLC sequencing or pan-cancer data; TS or OG indicate identification as Tumor Suppressor or OncoGene by TUSON (16).

**Table S4**

Chromosomal rearrangements identified in L002 and L008.

| Sample         | SV type        | left position   | right position  | mechanism      | R1      | R3      |         |
|----------------|----------------|-----------------|-----------------|----------------|---------|---------|---------|
| L002           | CTX            | chr2:155998950  | chr22:29065839  | alt-EJ         | present | present |         |
|                |                | chr2:236363124  | chr3:167098659  | VNTR           | present | present |         |
|                |                | chr18:32544412  | chr8:118344509  | VNTR           | present | present |         |
|                |                | chr1:31404868   | chr6:47733848   | alt-EJ         | present | -       |         |
|                |                | chr5:34614984   | chr22:42503929  | alt-EJ         | present | -       |         |
|                |                | chr6:13191304   | chr18:22134677  | NHEJ           | present | -       |         |
|                |                | chrX:11952758   | chr7:28756841   | alt-EJ         | present | -       |         |
|                |                | chrX:11953158   | chr5:11979024   | alt-EJ         | present | -       |         |
|                |                | chr11:93465300  | chr4:124476626  | NHEJ           | -       | present |         |
|                |                | chr12:116282296 | chr8:38486564   | NHEJ           | -       | present |         |
|                |                | chr5:147360434  | chr2:233682520  | alt-EJ         | -       | present |         |
|                |                | chr21:47629746  | chr15:72570211  | NHEJ           | -       | present |         |
|                |                | chr8:38486329   | chr12:116281769 | NHEJ           | -       | present |         |
|                |                | chr18:34666016  | chr21:45437425  | alt-EJ         | -       | present |         |
|                | ITX            | chr8:116143651  | chr8:118139173  | FoSTeS         | present | present |         |
|                |                | chr10:54090613  | chr10:54104578  | NHEJ           | present | -       |         |
|                |                | chr10:54322851  | chr10:54355481  | NHEJ           | present | -       |         |
|                |                | chr3:195620398  | chr3:190198721  | NHEJ           | present | -       |         |
|                |                | chr6:13191101   | chr6:76640812   | alt-EJ         | present | -       |         |
|                |                | chrX:11951845   | chrX:80996702   | alt-EJ         | present | -       |         |
|                | DEL            | chr12:102694542 | chr12:104762458 | alt-EJ         | -       | present |         |
|                |                | chr4:141659964  | chr4:142707155  | alt-EJ         | present | present |         |
|                |                | chr5:5321894    | chr5:13526542   | NHEJ           | present | present |         |
|                |                | chr4:187325363  | chr4:189488078  | alt-EJ         | present | -       |         |
|                |                | chr2:235046417  | chr2:237576417  | NHEJ           | -       | present |         |
|                | INS            | chr5:21812115   | chr5:45755186   | alt-EJ         | -       | present |         |
|                |                | chr8:33575222   | chr8:122792951  | alt-EJ         | -       | present |         |
|                |                | chr1:209720908  | chr1:209401475  | alt-EJ         | -       | present |         |
|                |                | chr10:53461830  | chr10:53401722  | alt-EJ         | -       | present |         |
|                | L008           | CTX             | chr11:65387961  | chr11:65255262 | NHEJ    | -       | present |
|                |                |                 | chr1:41420591   | chr6:153820131 | NHEJ    | present | present |
|                |                |                 | chr1:41429899   | chr6:138283492 | NHEJ    | present | present |
|                |                |                 | chr1:41522450   | chr6:138288122 | alt-EJ  | present | present |
|                |                |                 | chr3:142094843  | chr19:675705   | VNTR    | present | present |
|                |                |                 | chr4:21087179   | chr18:66132623 | alt-EJ  | present | present |
|                |                |                 | chr6:139208791  | chr1:41385823  | alt-EJ  | present | present |
|                |                |                 | chr8:118172674  | chr4:111859631 | VNTR    | present | present |
|                |                |                 | chr14:21641322  | chr19:10070782 | alt-EJ  | present | present |
|                |                |                 | chr14:21659076  | chr17:29633312 | FoSTeS  | present | present |
|                |                |                 | chr14:22931256  | chr17:27047855 | NHEJ    | present | present |
|                |                |                 | chr14:22945889  | chr17:40582022 | NHEJ    | present | present |
|                |                |                 | chr14:23865070  | chr20:9485468  | alt-EJ  | present | present |
|                |                |                 | chr14:43202845  | chr17:27041499 | NHEJ    | present | present |
| chr14:43221709 |                |                 | chr17:30598522  | alt-EJ         | present | present |         |
| chr14:43226786 |                |                 | chr17:40484004  | alt-EJ         | present | present |         |
| chr14:43983534 |                |                 | chr17:32557240  | NHEJ           | present | present |         |
| chr14:45606236 |                |                 | chr17:29633089  | NHEJ           | present | present |         |
| chr14:45607709 |                |                 | chr17:40582243  | NHEJ           | present | present |         |
| chr17:32006130 |                |                 | chr14:21438822  | NHEJ           | present | present |         |
| chr17:32531855 | chr14:45639647 | alt-EJ          | present         | present        |         |         |         |
| chr17:33970201 | chr14:43983604 | alt-EJ          | present         | present        |         |         |         |
| chr17:40583254 | chr19:10080082 | NHEJ            | present         | present        |         |         |         |

|     |                 |                |        |         |         |
|-----|-----------------|----------------|--------|---------|---------|
|     | chr18:3374296   | chr11:93333146 | VNTR   | present | present |
|     | chr18:63100198  | chr4:20528186  | NHEJ   | present | present |
|     | chr18:63106534  | chr3:88076969  | alt-EJ | present | present |
|     | chr19:10077608  | chr14:45881885 | alt-EJ | present | present |
|     | chr19:10077623  | chr14:23858748 | alt-EJ | present | present |
|     | chr19:10077841  | chr17:32532990 | NHEJ   | present | present |
|     | chr20:6037223   | chr17:27048797 | FoSTeS | present | present |
|     | chr20:7462891   | chr17:33945011 | alt-EJ | present | present |
|     | chr20:7463341   | chr17:32564592 | alt-EJ | present | present |
|     | chr20:7469802   | chr14:43913262 | NHEJ   | present | present |
| ITX | chr6:138283919  | chr6:116907520 | alt-EJ | present | present |
|     | chr14:45624623  | chr14:22934184 | NHEJ   | present | present |
|     | chr17:27047629  | chr17:32563709 | alt-EJ | present | present |
|     | chr17:27048551  | chr17:30619424 | FoSTeS | present | present |
|     | chr17:32556109  | chr17:40483031 | alt-EJ | present | present |
|     | chr18:1257044   | chr18:54722755 | NHEJ   | present | present |
|     | chr2:40299203   | chr2:41619314  | NHEJ   | present | -       |
|     | chr2:41618561   | chr2:40304683  | NA     | present | -       |
|     | chr4:21144053   | chr4:21639085  | NHEJ   | present | -       |
|     | chr4:37953544   | chr4:21638626  | alt-EJ | present | -       |
| DEL | chr14:22934146  | chr14:43204483 | alt-EJ | present | present |
|     | chr17:29659502  | chr17:32564783 | NHEJ   | present | present |
|     | chr18:25060027  | chr18:53994682 | NHEJ   | present | present |
| INS | chr1:45843008   | chr1:39747926  | alt-EJ | present | present |
|     | chr2:42346589   | chr2:42187285  | alt-EJ | present | present |
|     | chr11:103580980 | chr11:80028837 | NHEJ   | present | present |
|     | chr17:39957797  | chr17:27041102 | NHEJ   | present | present |
|     | chr18:25357067  | chr18:25063438 | alt-EJ | present | present |
|     | chr18:25382005  | chr18:1168244  | NHEJ   | present | present |
|     | chr18:66410779  | chr18:63101330 | alt-EJ | present | present |

Abbreviations: CTX, interchromosomal rearrangement; ITX, intrachromosomal rearrangement; DEL, deletion; INS, insertion.



## References and Notes

1. World Health Organization, [www.who.int/cancer/en/](http://www.who.int/cancer/en/) (2013).
2. R. Siegel, D. Naishadham, A. Jemal, Cancer statistics, 2013. *CA Cancer J. Clin.* **63**, 11–30 (2013). [Medline doi:10.3322/caac.21166](#)
3. H. Tanaka, K. Yanagisawa, K. Shinjo, A. Taguchi, K. Maeno, S. Tomida, Y. Shimada, H. Osada, T. Kosaka, H. Matsubara, T. Mitsudomi, Y. Sekido, M. Tanimoto, Y. Yatabe, T. Takahashi, Lineage-specific dependency of lung adenocarcinomas on the lung development regulator TTF-1. *Cancer Res.* **67**, 6007–6011 (2007). [Medline doi:10.1158/0008-5472.CAN-06-4774](#)
4. B. A. Weir, M. S. Woo, G. Getz, S. Perner, L. Ding, R. Beroukhi, W. M. Lin, M. A. Province, A. Kraja, L. A. Johnson, K. Shah, M. Sato, R. K. Thomas, J. A. Barletta, I. B. Borecki, S. Broderick, A. C. Chang, D. Y. Chiang, L. R. Chirieac, J. Cho, Y. Fujii, A. F. Gazdar, T. Giordano, H. Greulich, M. Hanna, B. E. Johnson, M. G. Kris, A. Lash, L. Lin, N. Lindeman, E. R. Mardis, J. D. McPherson, J. D. Minna, M. B. Morgan, M. Nadel, M. B. Orringer, J. R. Osborne, B. Ozenberger, A. H. Ramos, J. Robinson, J. A. Roth, V. Rusch, H. Sasaki, F. Shepherd, C. Sougnez, M. R. Spitz, M. S. Tsao, D. Twomey, R. G. Verhaak, G. M. Weinstock, D. A. Wheeler, W. Winckler, A. Yoshizawa, S. Yu, M. F. Zakowski, Q. Zhang, D. G. Beer, I. I. Wistuba, M. A. Watson, L. A. Garraway, M. Ladanyi, W. D. Travis, W. Pao, M. A. Rubin, S. B. Gabriel, R. A. Gibbs, H. E. Varmus, R. K. Wilson, E. S. Lander, M. Meyerson, Characterizing the cancer genome in lung adenocarcinoma. *Nature* **450**, 893–898 (2007). [Medline doi:10.1038/nature06358](#)
5. L. Ding, G. Getz, D. A. Wheeler, E. R. Mardis, M. D. McLellan, K. Cibulskis, C. Sougnez, H. Greulich, D. M. Muzny, M. B. Morgan, L. Fulton, R. S. Fulton, Q. Zhang, M. C. Wendl, M. S. Lawrence, D. E. Larson, K. Chen, D. J. Dooling, A. Sabo, A. C. Hawes, H. Shen, S. N. Jhangiani, L. R. Lewis, O. Hall, Y. Zhu, T. Mathew, Y. Ren, J. Yao, S. E. Scherer, K. Clerc, G. A. Metcalf, B. Ng, A. Milosavljevic, M. L. Gonzalez-Garay, J. R. Osborne, R. Meyer, X. Shi, Y. Tang, D. C. Koboldt, L. Lin, R. Abbott, T. L. Miner, C. Pohl, G. Fewell, C. Haipek, H. Schmidt, B. H. Dunford-Shore, A. Kraja, S. D. Crosby, C. S. Sawyer, T. Vickery, S. Sander, J. Robinson, W. Winckler, J. Baldwin, L. R. Chirieac, A. Dutt, T. Fennell, M. Hanna, B. E. Johnson, R. C. Onofrio, R. K. Thomas, G. Tonon, B. A. Weir, X. Zhao, L. Ziaugra, M. C. Zody, T. Giordano, M. B. Orringer, J. A. Roth, M. R. Spitz, I. I. Wistuba, B. Ozenberger, P. J. Good, A. C. Chang, D. G. Beer, M. A. Watson, M. Ladanyi, S. Broderick, A. Yoshizawa, W. D. Travis, W. Pao, M. A. Province, G. M. Weinstock, H. E. Varmus, S. B. Gabriel, E. S. Lander, R. A. Gibbs, M. Meyerson, R. K. Wilson, Somatic mutations affect key pathways in lung adenocarcinoma. *Nature* **455**, 1069–1075 (2008). [Medline doi:10.1038/nature07423](#)
6. Z. Kan, B. S. Jaiswal, J. Stinson, V. Janakiraman, D. Bhatt, H. M. Stern, P. Yue, P. M. Haverty, R. Bourgon, J. Zheng, M. Moorhead, S. Chaudhuri, L. P. Tomsho, B. A. Peters, K. Pujara, S. Cordes, D. P. Davis, V. E. Carlton, W. Yuan, L. Li, W. Wang, C. Eigenbrot, J. S. Kaminker, D. A. Eberhard, P. Waring, S. C. Schuster, Z. Modrusan, Z. Zhang, D. Stokoe, F. J. de Sauvage, M. Faham, S. Seshagiri, Diverse somatic mutation patterns and pathway alterations in human cancers. *Nature* **466**, 869–873 (2010). [Medline doi:10.1038/nature09208](#)

7. S. L. Carter, K. Cibulskis, E. Helman, A. McKenna, H. Shen, T. Zack, P. W. Laird, R. C. Onofrio, W. Winckler, B. A. Weir, R. Beroukhim, D. Pellman, D. A. Levine, E. S. Lander, M. Meyerson, G. Getz, Absolute quantification of somatic DNA alterations in human cancer. *Nat. Biotechnol.* **30**, 413–421 (2012). [Medline doi:10.1038/nbt.2203](#)
8. T. I. Zack, S. E. Schumacher, S. L. Carter, A. D. Cherniack, G. Saksena, B. Tabak, M. S. Lawrence, C. Z. Zhang, J. Wala, C. H. Mermel, C. Sougnez, S. B. Gabriel, B. Hernandez, H. Shen, P. W. Laird, G. Getz, M. Meyerson, R. Beroukhim, Pan-cancer patterns of somatic copy number alteration. *Nat. Genet.* **45**, 1134–1140 (2013). [Medline doi:10.1038/ng.2760](#)
9. R. Govindan, L. Ding, M. Griffith, J. Subramanian, N. D. Dees, K. L. Kanchi, C. A. Maher, R. Fulton, L. Fulton, J. Wallis, K. Chen, J. Walker, S. McDonald, R. Bose, D. Ornitz, D. Xiong, M. You, D. J. Dooling, M. Watson, E. R. Mardis, R. K. Wilson, Genomic landscape of non-small cell lung cancer in smokers and never-smokers. *Cell* **150**, 1121–1134 (2012). [Medline doi:10.1016/j.cell.2012.08.024](#)
10. E. D. Pleasance, P. J. Stephens, S. O’Meara, D. J. McBride, A. Meynert, D. Jones, M. L. Lin, D. Beare, K. W. Lau, C. Greenman, I. Varela, S. Nik-Zainal, H. R. Davies, G. R. Ordoñez, L. J. Mudie, C. Latimer, S. Edkins, L. Stebbings, L. Chen, M. Jia, C. Leroy, J. Marshall, A. Menzies, A. Butler, J. W. Teague, J. Mangion, Y. A. Sun, S. F. McLaughlin, H. E. Peckham, E. F. Tsung, G. L. Costa, C. C. Lee, J. D. Minna, A. Gazdar, E. Birney, M. D. Rhodes, K. J. McKernan, M. R. Stratton, P. A. Futreal, P. J. Campbell, A small-cell lung cancer genome with complex signatures of tobacco exposure. *Nature* **463**, 184–190 (2010). [Medline doi:10.1038/nature08629](#)
11. W. Lee, Z. Jiang, J. Liu, P. M. Haverty, Y. Guan, J. Stinson, P. Yue, Y. Zhang, K. P. Pant, D. Bhatt, C. Ha, S. Johnson, M. I. Kennemer, S. Mohan, I. Nazarenko, C. Watanabe, A. B. Sparks, D. S. Shames, R. Gentleman, F. J. de Sauvage, H. Stern, A. Pandita, D. G. Ballinger, R. Drmanac, Z. Modrusan, S. Seshagiri, Z. Zhang, The mutation spectrum revealed by paired genome sequences from a lung cancer patient. *Nature* **465**, 473–477 (2010). [Medline doi:10.1038/nature09004](#)
12. G. P. Pfeifer, P. Hainaut, On the origin of G → T transversions in lung cancer. *Mutat. Res.* **526**, 39–43 (2003). [Medline doi:10.1016/S0027-5107\(03\)00013-7](#)
13. S. A. Roberts, M. S. Lawrence, L. J. Klimczak, S. A. Grimm, D. Fargo, P. Stojanov, A. Kiezun, G. V. Kryukov, S. L. Carter, G. Saksena, S. Harris, R. R. Shah, M. A. Resnick, G. Getz, D. A. Gordenin, An APOBEC cytidine deaminase mutagenesis pattern is widespread in human cancers. *Nat. Genet.* **45**, 970–976 (2013). [Medline doi:10.1038/ng.2702](#)
14. M. B. Burns, N. A. Temiz, R. S. Harris, Evidence for APOBEC3B mutagenesis in multiple human cancers. *Nat. Genet.* **45**, 977–983 (2013). [Medline doi:10.1038/ng.2701](#)
15. L. B. Alexandrov, S. Nik-Zainal, D. C. Wedge, S. A. J. R. Aparicio, S. Behjati, A. V. Biankin, G. R. Bignell, N. Bolli, A. Borg, A.-L. Børresen-Dale, S. Boyault, B. Burkhardt, A. P. Butler, C. Caldas, H. R. Davies, C. Desmedt, R. Eils, J. E. Eyfjörd, J. A. Foekens, M. Greaves, F. Hosoda, B. Hutter, T. Ilicic, S. Imbeaud, M. Imielinski, N. Jäger, D. T. Jones, D. Jones, S. Knappskog, M. Kool, S. R. Lakhani, C. López-Otín, S. Martin, N. C. Munshi, H. Nakamura, P. A. Northcott, M. Pajic, E. Papaemmanuil, A. Paradiso, J. V.

- Pearson, X. S. Puente, K. Raine, M. Ramakrishna, A. L. Richardson, J. Richter, P. Rosenstiel, M. Schlesner, T. N. Schumacher, P. N. Span, J. W. Teague, Y. Totoki, A. N. J. Tutt, R. Valdés-Mas, M. M. van Buuren, L. van 't Veer, A. Vincent-Salomon, N. Waddell, L. R. Yates, J. Zucman-Rossi, P. A. Futreal, U. McDermott, P. Lichter, M. Meyerson, S. M. Grimmond, R. Siebert, E. Campo, T. Shibata, S. M. Pfister, P. J. Campbell, M. R. Stratton Australian Pancreatic Cancer Genome Initiative ICGC Breast Cancer Consortium ICGC MMML-Seq Consortium ICGC PedBrain, Signatures of mutational processes in human cancer. *Nature* **500**, 415–421 (2013). [Medline](#) [doi:10.1038/nature12477](https://doi.org/10.1038/nature12477)
16. Detailed information on methods is available on *Science* online.
  17. S. V. Sharma, D. W. Bell, J. Settleman, D. A. Haber, Epidermal growth factor receptor mutations in lung cancer. *Nat. Rev. Cancer* **7**, 169–181 (2007). [Medline](#) [doi:10.1038/nrc2088](https://doi.org/10.1038/nrc2088)
  18. N. Bolli, H. Avet-Loiseau, D. C. Wedge, P. Van Loo, L. B. Alexandrov, I. Martincorena, K. J. Dawson, F. Iorio, S. Nik-Zainal, G. R. Bignell, J. W. Hinton, Y. Li, J. M. Tubio, S. McLaren, S. O' Meara, A. P. Butler, J. W. Teague, L. Mudie, E. Anderson, N. Rashid, Y. T. Tai, M. A. Shammas, A. S. Sperling, M. Fulciniti, P. G. Richardson, G. Parmigiani, F. Magrangeas, S. Minvielle, P. Moreau, M. Attal, T. Facon, P. A. Futreal, K. C. Anderson, P. J. Campbell, N. C. Munshi, Heterogeneity of genomic evolution and mutational profiles in multiple myeloma. *Nat. Commun.* **5**, 2997 (2014). [Medline](#) [doi:10.1038/ncomms3997](https://doi.org/10.1038/ncomms3997)
  19. M. Imielinski, A. H. Berger, P. S. Hammerman, B. Hernandez, T. J. Pugh, E. Hodis, J. Cho, J. Suh, M. Capelletti, A. Sivachenko, C. Sougnez, D. Auclair, M. S. Lawrence, P. Stojanov, K. Cibulskis, K. Choi, L. de Waal, T. Sharifnia, A. Brooks, H. Greulich, S. Banerji, T. Zander, D. Seidel, F. Leenders, S. Ansén, C. Ludwig, W. Engel-Riedel, E. Stoelben, J. Wolf, C. Goparju, K. Thompson, W. Winckler, D. Kwiatkowski, B. E. Johnson, P. A. Jänne, V. A. Miller, W. Pao, W. D. Travis, H. I. Pass, S. B. Gabriel, E. S. Lander, R. K. Thomas, L. A. Garraway, G. Getz, M. Meyerson, Mapping the hallmarks of lung adenocarcinoma with massively parallel sequencing. *Cell* **150**, 1107–1120 (2012). [Medline](#) [doi:10.1016/j.cell.2012.08.029](https://doi.org/10.1016/j.cell.2012.08.029)
  20. M. S. Lawrence, P. Stojanov, C. H. Mermel, J. T. Robinson, L. A. Garraway, T. R. Golub, M. Meyerson, S. B. Gabriel, E. S. Lander, G. Getz, Discovery and saturation analysis of cancer genes across 21 tumour types. *Nature* **505**, 495–501 (2014). [Medline](#) [doi:10.1038/nature12912](https://doi.org/10.1038/nature12912)
  21. P. Van Loo, S. H. Nordgard, O. C. Lingjærde, H. G. Russnes, I. H. Rye, W. Sun, V. J. Weigman, P. Marynen, A. Zetterberg, B. Naume, C. M. Perou, A. L. Børresen-Dale, V. N. Kristensen, Allele-specific copy number analysis of tumors. *Proc. Natl. Acad. Sci. U.S.A.* **107**, 16910–16915 (2010). [Medline](#) [doi:10.1073/pnas.1009843107](https://doi.org/10.1073/pnas.1009843107)
  22. S. Nik-Zainal, P. Van Loo, D. C. Wedge, L. B. Alexandrov, C. D. Greenman, K. W. Lau, K. Raine, D. Jones, J. Marshall, M. Ramakrishna, A. Shlien, S. L. Cooke, J. Hinton, A. Menzies, L. A. Stebbings, C. Leroy, M. Jia, R. Rance, L. J. Mudie, S. J. Gamble, P. J. Stephens, S. McLaren, P. S. Tarpey, E. Papaemmanuil, H. R. Davies, I. Varela, D. J. McBride, G. R. Bignell, K. Leung, A. P. Butler, J. W. Teague, S. Martin, G. Jönsson, O.

- Mariani, S. Boyault, P. Miron, A. Fatima, A. Langerød, S. A. Aparicio, A. Tutt, A. M. Sieuwerts, Å. Borg, G. Thomas, A. V. Salomon, A. L. Richardson, A. L. Børresen-Dale, P. A. Futreal, M. R. Stratton, P. J. Campbell; Breast Cancer Working Group of the International Cancer Genome Consortium, The life history of 21 breast cancers. *Cell* **149**, 994–1007 (2012). [Medline doi:10.1016/j.cell.2012.04.023](#)
23. A. Malhotra, M. Lindberg, G. G. Faust, M. L. Leibowitz, R. A. Clark, R. M. Layer, A. R. Quinlan, I. M. Hall, Breakpoint profiling of 64 cancer genomes reveals numerous complex rearrangements spawned by homology-independent mechanisms. *Genome Res.* **23**, 762–776 (2013). [Medline doi:10.1101/gr.143677.112](#)
  24. S. F. Bunting, A. Nussenzweig, End-joining, translocations and cancer. *Nat. Rev. Cancer* **13**, 443–454 (2013). [Medline doi:10.1038/nrc3537](#)
  25. C. Z. Zhang, M. L. Leibowitz, D. Pellman, Chromothripsis and beyond: Rapid genome evolution from complex chromosomal rearrangements. *Genes Dev.* **27**, 2513–2530 (2013). [Medline doi:10.1101/gad.229559.113](#)
  26. S. C. Baca, D. Prandi, M. S. Lawrence, J. M. Mosquera, A. Romanel, Y. Drier, K. Park, N. Kitabayashi, T. Y. MacDonald, M. Ghandi, E. Van Allen, G. V. Kryukov, A. Sboner, J. P. Theurillat, T. D. Soong, E. Nickerson, D. Auclair, A. Tewari, H. Beltran, R. C. Onofrio, G. Boysen, C. Guiducci, C. E. Barbieri, K. Cibulskis, A. Sivachenko, S. L. Carter, G. Saksena, D. Voet, A. H. Ramos, W. Winckler, M. Cipicchio, K. Ardlie, P. W. Kantoff, M. F. Berger, S. B. Gabriel, T. R. Golub, M. Meyerson, E. S. Lander, O. Elemento, G. Getz, F. Demichelis, M. A. Rubin, L. A. Garraway, Punctuated evolution of prostate cancer genomes. *Cell* **153**, 666–677 (2013). [Medline doi:10.1016/j.cell.2013.03.021](#)
  27. M. Gerlinger, S. Horswell, J. Larkin, A. J. Rowan, M. P. Salm, I. Varela, R. Fisher, N. McGranahan, N. Matthews, C. R. Santos, P. Martinez, B. Phillimore, S. Begum, A. Rabinowitz, B. Spencer-Dene, S. Gulati, P. A. Bates, G. Stamp, L. Pickering, M. Gore, D. L. Nicol, S. Hazell, P. A. Futreal, A. Stewart, C. Swanton, Genomic architecture and evolution of clear cell renal cell carcinomas defined by multiregion sequencing. *Nat. Genet.* **46**, 225–233 (2014). [Medline doi:10.1038/ng.2891](#)
  28. M. Gerlinger, A. J. Rowan, S. Horswell, J. Larkin, D. Endesfelder, E. Gronroos, P. Martinez, N. Matthews, A. Stewart, P. Tarpey, I. Varela, B. Phillimore, S. Begum, N. Q. McDonald, A. Butler, D. Jones, K. Raine, C. Latimer, C. R. Santos, M. Nohadani, A. C. Eklund, B. Spencer-Dene, G. Clark, L. Pickering, G. Stamp, M. Gore, Z. Szallasi, J. Downward, P. A. Futreal, C. Swanton, Intratumor heterogeneity and branched evolution revealed by multiregion sequencing. *N. Engl. J. Med.* **366**, 883–892 (2012). [Medline doi:10.1056/NEJMoa1113205](#)
  29. M. Reck, D. F. Heigener, T. Mok, J. C. Soria, K. F. Rabe, Management of non-small-cell lung cancer: Recent developments. *Lancet* **382**, 709–719 (2013). [Medline doi:10.1016/S0140-6736\(13\)61502-0](#)
  30. H. Davies, G. R. Bignell, C. Cox, P. Stephens, S. Edkins, S. Clegg, J. Teague, H. Woffendin, M. J. Garnett, W. Bottomley, N. Davis, E. Dicks, R. Ewing, Y. Floyd, K. Gray, S. Hall, R. Hawes, J. Hughes, V. Kosmidou, A. Menzies, C. Mould, A. Parker, C. Stevens, S. Watt, S. Hooper, R. Wilson, H. Jayatilake, B. A. Gusterson, C. Cooper, J. Shipley, D.

- Hargrave, K. Pritchard-Jones, N. Maitland, G. Chenevix-Trench, G. J. Riggins, D. D. Bigner, G. Palmieri, A. Cossu, A. Flanagan, A. Nicholson, J. W. Ho, S. Y. Leung, S. T. Yuen, B. L. Weber, H. F. Seigler, T. L. Darrow, H. Paterson, R. Marais, C. J. Marshall, R. Wooster, M. R. Stratton, P. A. Futreal, Mutations of the BRAF gene in human cancer. *Nature* **417**, 949–954 (2002). [Medline doi:10.1038/nature00766](#)
31. S. Kang, A. G. Bader, P. K. Vogt, Phosphatidylinositol 3-kinase mutations identified in human cancer are oncogenic. *Proc. Natl. Acad. Sci. U.S.A.* **102**, 802–807 (2005). [Medline doi:10.1073/pnas.0408864102](#)
32. H. Shi, W. Hugo, X. Kong, A. Hong, R. C. Koya, G. Moriceau, T. Chodon, R. Guo, D. B. Johnson, K. B. Dahlman, M. C. Kelley, R. F. Kefford, B. Chmielowski, J. A. Glaspy, J. A. Sosman, N. van Baren, G. V. Long, A. Ribas, R. S. Lo, Acquired resistance and clonal evolution in melanoma during BRAF inhibitor therapy. *Cancer Discov.* **4**, 80–93 (2014). [Medline doi:10.1158/2159-8290.CD-13-0642](#)
33. C. J. Lord, A. Ashworth, The DNA damage response and cancer therapy. *Nature* **481**, 287–294 (2012). [Medline doi:10.1038/nature10760](#)
34. S. M. Dewhurst, N. McGranahan, R. A. Burrell, A. J. Rowan, E. Grönroos, D. Endesfelder, T. Joshi, D. Mouradov, P. Gibbs, R. L. Ward, N. J. Hawkins, Z. Szallasi, O. M. Sieber, C. Swanton, Tolerance of whole-genome doubling propagates chromosomal instability and accelerates cancer genome evolution. *Cancer Discov.* **4**, 175–185 (2014). [Medline doi:10.1158/2159-8290.CD-13-0285](#)
35. R. Sotillo, J. M. Schvartzman, N. D. Socci, R. Benezra, Mad2-induced chromosome instability leads to lung tumour relapse after oncogene withdrawal. *Nature* **464**, 436–440 (2010). [Medline doi:10.1038/nature08803](#)
36. A. J. Lee, D. Endesfelder, A. J. Rowan, A. Walther, N. J. Birnbak, P. A. Futreal, J. Downward, Z. Szallasi, I. P. Tomlinson, M. Howell, M. Kschischo, C. Swanton, Chromosomal instability confers intrinsic multidrug resistance. *Cancer Res.* **71**, 1858–1870 (2011). [Medline doi:10.1158/0008-5472.CAN-10-3604](#)
37. J. C. Soria, C. Cruz, R. Bahleda, J. P. Delord, L. Horn, R. S. Herbst, D. Spigel, A. Mokatrin, G. Fine, S. Gettinger, Clinical activity, safety and biomarkers of PD-L1 blockade in non-small cell lung cancer (NSCLC). *Eur. J. Cancer* **49** (suppl. 2), 3408 (2013).
38. H. Li, R. Durbin, Fast and accurate short read alignment with Burrows-Wheeler transform. *Bioinformatics* **25**, 1754–1760 (2009). [Medline doi:10.1093/bioinformatics/btp324](#)
39. D. C. Koboldt, Q. Zhang, D. E. Larson, D. Shen, M. D. McLellan, L. Lin, C. A. Miller, E. R. Mardis, L. Ding, R. K. Wilson, VarScan 2: Somatic mutation and copy number alteration discovery in cancer by exome sequencing. *Genome Res.* **22**, 568–576 (2012). [Medline doi:10.1101/gr.129684.111](#)
40. H. Li, B. Handsaker, A. Wysoker, T. Fennell, J. Ruan, N. Homer, G. Marth, G. Abecasis, R. Durbin; 1000 Genome Project Data Processing Subgroup, The Sequence Alignment/Map format and SAMtools. *Bioinformatics* **25**, 2078–2079 (2009). [Medline doi:10.1093/bioinformatics/btp352](#)
41. L. Ding, T. J. Ley, D. E. Larson, C. A. Miller, D. C. Koboldt, J. S. Welch, J. K. Ritchey, M. A. Young, T. Lamprecht, M. D. McLellan, J. F. McMichael, J. W. Wallis, C. Lu, D.



- Shen, C. C. Harris, D. J. Dooling, R. S. Fulton, L. L. Fulton, K. Chen, H. Schmidt, J. Kalicki-Veizer, V. J. Magrini, L. Cook, S. D. McGrath, T. L. Vickery, M. C. Wendl, S. Heath, M. A. Watson, D. C. Link, M. H. Tomasson, W. D. Shannon, J. E. Payton, S. Kulkarni, P. Westervelt, M. J. Walter, T. A. Graubert, E. R. Mardis, R. K. Wilson, J. F. DiPersio, Clonal evolution in relapsed acute myeloid leukaemia revealed by whole-genome sequencing. *Nature* **481**, 506–510 (2012). [Medline doi:10.1038/nature10738](#)
42. K. Ye, M. H. Schulz, Q. Long, R. Apweiler, Z. Ning, Pindel: A pattern growth approach to detect break points of large deletions and medium sized insertions from paired-end short reads. *Bioinformatics* **25**, 2865–2871 (2009). [Medline doi:10.1093/bioinformatics/btp394](#)
43. K. Wang, M. Li, H. Hakonarson, ANNOVAR: Functional annotation of genetic variants from high-throughput sequencing data. *Nucleic Acids Res.* **38**, e164 (2010). [Medline doi:10.1093/nar/gkq603](#)
44. X. Liu, X. Jian, E. Boerwinkle, dbNSFP: A lightweight database of human nonsynonymous SNPs and their functional predictions. *Hum. Mutat.* **32**, 894–899 (2011). [Medline doi:10.1002/humu.21517](#)
45. K. Nakamura, T. Oshima, T. Morimoto, S. Ikeda, H. Yoshikawa, Y. Shiwa, S. Ishikawa, M. C. Linak, A. Hirai, H. Takahashi, M. Altaf-Ul-Amin, N. Ogasawara, S. Kanaya, Sequence-specific error profile of Illumina sequencers. *Nucleic Acids Res.* **39**, e90 (2011). [Medline doi:10.1093/nar/gkr344](#)
46. K. J. McKernan, H. E. Peckham, G. L. Costa, S. F. McLaughlin, Y. Fu, E. F. Tsung, C. R. Clouser, C. Duncan, J. K. Ichikawa, C. C. Lee, Z. Zhang, S. S. Ranade, E. T. Dimalanta, F. C. Hyland, T. D. Sokolsky, L. Zhang, A. Sheridan, H. Fu, C. L. Hendrickson, B. Li, L. Kotler, J. R. Stuart, J. A. Malek, J. M. Manning, A. A. Antipova, D. S. Perez, M. P. Moore, K. C. Hayashibara, M. R. Lyons, R. E. Beaudoin, B. E. Coleman, M. W. Laptewicz, A. E. Sannicandro, M. D. Rhodes, R. K. Gottimukkala, S. Yang, V. Bafna, A. Bashir, A. MacBride, C. Alkan, J. M. Kidd, E. E. Eichler, M. G. Reese, F. M. De La Vega, A. P. Blanchard, Sequence and structural variation in a human genome uncovered by short-read, massively parallel ligation sequencing using two-base encoding. *Genome Res.* **19**, 1527–1541 (2009). [Medline doi:10.1101/gr.091868.109](#)
47. E. Papaemmanuil, M. Cazzola, J. Boultwood, L. Malcovati, P. Vyas, D. Bowen, A. Pellagatti, J. S. Wainscoat, E. Hellstrom-Lindberg, C. Gambacorti-Passerini, A. L. Godfrey, I. Rapado, A. Cvejic, R. Rance, C. McGee, P. Ellis, L. J. Mudie, P. J. Stephens, S. McLaren, C. E. Massie, P. S. Tarpey, I. Varela, S. Nik-Zainal, H. R. Davies, A. Shlien, D. Jones, K. Raine, J. Hinton, A. P. Butler, J. W. Teague, E. J. Baxter, J. Score, A. Galli, M. G. Della Porta, E. Travaglino, M. Groves, S. Tauro, N. C. Munshi, K. C. Anderson, A. El-Naggar, A. Fischer, V. Mustonen, A. J. Warren, N. C. Cross, A. R. Green, P. A. Futreal, M. R. Stratton, P. J. Campbell; Chronic Myeloid Disorders Working Group of the International Cancer Genome Consortium, Somatic SF3B1 mutation in myelodysplasia with ring sideroblasts. *N. Engl. J. Med.* **365**, 1384–1395 (2011). [Medline doi:10.1056/NEJMoal103283](#)
48. I. Varela, P. Tarpey, K. Raine, D. Huang, C. K. Ong, P. Stephens, H. Davies, D. Jones, M. L. Lin, J. Teague, G. Bignell, A. Butler, J. Cho, G. L. Dalgliesh, D. Galappaththige, C. Greenman, C. Hardy, M. Jia, C. Latimer, K. W. Lau, J. Marshall, S. McLaren, A.

- Menzies, L. Mudie, L. Stebbings, D. A. Largaespada, L. F. Wessels, S. Richard, R. J. Kahnoski, J. Anema, D. A. Tuveson, P. A. Perez-Mancera, V. Mustonen, A. Fischer, D. J. Adams, A. Rust, W. Chan-on, C. Subimerb, K. Dykema, K. Furge, P. J. Campbell, B. T. Teh, M. R. Stratton, P. A. Futreal, Exome sequencing identifies frequent mutation of the SWI/SNF complex gene PBRM1 in renal carcinoma. *Nature* **469**, 539–542 (2011). [Medline doi:10.1038/nature09639](#)
49. G. Schwarz, Estimating the dimension of a model. *Ann. Stat.* **6**, 461–464 (1978). [doi:10.1214/aos/1176344136](#)
50. K. Tamura, D. Peterson, N. Peterson, G. Stecher, M. Nei, S. Kumar, MEGA5: Molecular evolutionary genetics analysis using maximum likelihood, evolutionary distance, and maximum parsimony methods. *Mol. Biol. Evol.* **28**, 2731–2739 (2011). [Medline doi:10.1093/molbev/msr121](#)
51. R. McLendon *et al.* Cancer Genome Atlas Research Network, Comprehensive genomic characterization defines human glioblastoma genes and core pathways. *Nature* **455**, 1061–1068 (2008). [Medline doi:10.1038/nature07385](#)
52. P. S. Hammerman, M. S. Lawrence, D. Voet, R. Jing, K. Cibulskis, A. Sivachenko, P. Stojanov, A. McKenna, E. S. Lander, S. Gabriel, G. Getz, C. Sougnez, M. Imielinski, E. Helman, B. Hernandez, N. H. Pho, M. Meyerson, A. Chu, H.-J. E. Chun, A. J. Mungall, E. Pleasance, A. Gordon Robertson, P. Sipahimalani, D. Stoll, M. Balasundaram, I. Birol, Y. S. N. Butterfield, E. Chuah, R. J. N. Coope, R. Corbett, N. Dhalla, R. Guin, A. He, C. Hirst, M. Hirst, R. A. Holt, D. Lee, H. I. Li, M. Mayo, R. A. Moore, K. Mungall, K. Ming Nip, A. Olshen, J. E. Schein, J. R. Slobodan, A. Tam, N. Thiessen, R. Varhol, T. Zeng, Y. Zhao, S. J. M. Jones, M. A. Marra, G. Saksena, A. D. Cherniack, S. E. Schumacher, B. Tabak, S. L. Carter, N. H. Pho, H. Nguyen, R. C. Onofrio, A. Crenshaw, K. Ardlie, R. Beroukhim, W. Winckler, P. S. Hammerman, G. Getz, M. Meyerson, A. Protopopov, J. Zhang, A. Hadjipanayis, S. Lee, R. Xi, L. Yang, X. Ren, H. Zhang, S. Shukla, P.-C. Chen, P. Haseley, E. Lee, L. Chin, P. J. Park, R. Kucherlapati, N. D. Socci, Y. Liang, N. Schultz, L. Borsu, A. E. Lash, A. Viale, C. Sander, M. Ladanyi, J. Todd Auman, K. A. Hoadley, M. D. Wilkerson, Y. Shi, C. Liquori, S. Meng, L. Li, Y. J. Turman, M. D. Topal, D. Tan, S. Waring, E. Buda, J. Walsh, C. D. Jones, P. A. Mieczkowski, D. Singh, J. Wu, A. Gulabani, P. Dolina, T. Bodenheimer, A. P. Hoyle, J. V. Simons, M. G. Soloway, L. E. Mose, S. R. Jefferys, S. Balu, B. D. O'Connor, J. F. Prins, J. Liu, D. Y. Chiang, D. Neil Hayes, C. M. Perou, L. Cope, L. Danilova, D. J. Weisenberger, D. T. Maglinte, F. Pan, D. J. Van Den Berg, T. Triche Jr., J. G. Herman, S. B. Baylin, P. W. Laird, G. Getz, M. Noble, D. Voet, G. Saksena, N. Gehlenborg, D. DiCara, J. Zhang, H. Zhang, C.-J. Wu, S. Yingchun Liu, M. S. Lawrence, L. Zou, A. Sivachenko, P. Lin, P. Stojanov, R. Jing, J. Cho, M.-D. Nazaire, J. Robinson, H. Thorvaldsdottir, J. Mesirov, P. J. Park, L. Chin, N. Schultz, R. Sinha, G. Ciriello, E. Cerami, B. Gross, A. Jacobsen, J. Gao, B. Arman Aksoy, N. Weinhold, R. Ramirez, B. S. Taylor, Y. Antipin, B. Reva, R. Shen, Q. Mo, V. Seshan, P. K. Paik, M. Ladanyi, C. Sander, R. Akbani, N. Zhang, B. M. Broom, T. Casasent, A. Unruh, C. Wakefield, R. Craig Cason, K. A. Baggerly, J. N. Weinstein, D. Haussler, C. C. Benz, J. M. Stuart, J. Zhu, C. Szeto, G. K. Scott, C. Yau, S. Ng, T. Goldstein, P. Waltman, A. Sokolov, K. Ellrott, E. A. Collisson, D. Zerbino, C. Wilks, S. Ma, B. Craft, M. D. Wilkerson, J. Todd Auman, K. A. Hoadley, Y. Du, C. Cabanski, V. Walter, D. Singh, J. Wu, A. Gulabani, T. Bodenheimer, A. P. Hoyle, J. V.

- Simons, M. G. Soloway, L. E. Mose, S. R. Jefferys, S. Balu, J. S. Marron, Y. Liu, K. Wang, J. Liu, J. F. Prins, D. Neil Hayes, C. M. Perou, C. J. Creighton, Y. Zhang, W. D. Travis, N. Rehkman, J. Yi, M. C. Aubry, R. Cheney, S. Dacic, D. Flieder, W. Funkhouser, P. Illei, J. Myers, M.-S. Tsao, R. Penny, D. Mallery, T. Shelton, M. Hatfield, S. Morris, P. Yena, C. Shelton, M. Sherman, J. Paulauskis, M. Meyerson, S. B. Baylin, R. Govindan, R. Akbani, I. Azodo, D. Beer, R. Bose, L. A. Byers, D. Carbone, L.-W. Chang, D. Chiang, A. Chu, E. Chun, E. Collisson, L. Cope, C. J. Creighton, L. Danilova, L. Ding, G. Getz, P. S. Hammerman, D. Neil Hayes, B. Hernandez, J. G. Herman, J. Heymach, C. Ida, M. Imielinski, B. Johnson, I. Jurisica, J. Kaufman, F. Kosari, R. Kucherlapati, D. Kwiatkowski, M. Ladanyi, M. S. Lawrence, C. A. Maher, A. Mungall, S. Ng, W. Pao, M. Peifer, R. Penny, G. Robertson, V. Rusch, C. Sander, N. Schultz, R. Shen, J. Siegfried, R. Sinha, A. Sivachenko, C. Sougnez, D. Stoll, J. Stuart, R. K. Thomas, S. Tomaszek, M.-S. Tsao, W. D. Travis, C. Vaske, J. N. Weinstein, D. Weisenberger, D. A. Wigle, M. D. Wilkerson, C. Wilks, P. Yang, J. John Zhang, M. A. Jensen, R. Sfeir, A. B. Kahn, A. L. Chu, P. Kothiyal, Z. Wang, E. E. Snyder, J. Pontius, T. D. Pihl, B. Ayala, M. Backus, J. Walton, J. Baboud, D. L. Berton, M. C. Nicholls, D. Srinivasan, R. Raman, S. Girshik, P. A. Kigonya, S. Alonso, R. N. Sanbhadti, S. P. Barletta, J. M. Greene, D. A. Pot, M.-S. Tsao, B. Bandarchi-Chamkhaleh, J. Boyd, J. E. Weaver, D. A. Wigle, I. A. Azodo, S. C. Tomaszek, M. Christine Aubry, C. M. Ida, P. Yang, F. Kosari, M. V. Brock, K. Rogers, M. Rutledge, T. Brown, B. Lee, J. Shin, D. Trusty, R. Dhir, J. M. Siegfried, O. Potapova, K. V. Fedosenko, E. Nemirovich-Danchenko, V. Rusch, M. Zakowski, M. V. Iacocca, J. Brown, B. Rabeno, C. Czerwinski, N. Petrelli, Z. Fan, N. Todaro, J. Eckman, J. Myers, W. Kimryn Rathmell, L. B. Thorne, M. Huang, L. Boice, A. Hill, R. Penny, D. Mallery, E. Curley, C. Shelton, P. Yena, C. Morrison, C. Gaudioso, J. M. S. Bartlett, S. Kodeeswaran, B. Zanke, H. Sekhon, K. David, H. Juhl, X. Van Le, B. Kohl, R. Thorp, N. Viet Tien, N. Van Bang, H. Sussman, B. Duc Phu, R. Hajek, N. Phi Hung, K. Z. Khan, T. Muley, K. R. Mills Shaw, M. Sheth, L. Yang, K. Buetow, T. Davidsen, J. A. Demchok, G. Eley, M. Ferguson, L. A. L. Dillon, C. Schaefer, M. S. Guyer, B. A. Ozenberger, J. D. Palchik, J. Peterson, H. J. Sofia, E. Thomson, P. S. Hammerman, D. Neil Hayes, M. D. Wilkerson, N. Schultz, R. Bose, A. Chu, E. A. Collisson, L. Cope, C. J. Creighton, G. Getz, J. G. Herman, B. E. Johnson, R. Kucherlapati, M. Ladanyi, C. A. Maher, G. Robertson, C. Sander, R. Shen, R. Sinha, A. Sivachenko, R. K. Thomas, W. D. Travis, M.-S. Tsao, J. N. Weinstein, D. A. Wigle, S. B. Baylin, R. Govindan, M. Meyerson; Cancer Genome Atlas Research Network, Comprehensive genomic characterization of squamous cell lung cancers. *Nature* **489**, 519–525 (2012). [Medline doi:10.1038/nature11404](#)
53. T. Davoli, A. W. Xu, K. E. Mengwasser, L. M. Sack, J. C. Yoon, P. J. Park, S. J. Elledge, Cumulative haploinsufficiency and triplosensitivity drive aneuploidy patterns and shape the cancer genome. *Cell* **155**, 948–962 (2013). [Medline doi:10.1016/j.cell.2013.10.011](#)
54. G. Nilsen, K. Liestøl, P. Van Loo, H. K. Moen Vollan, M. B. Eide, O. M. Rueda, S. F. Chin, R. Russell, L. O. Baumbusch, C. Caldas, A. L. Børresen-Dale, O. C. Lingjaerde, Copynumber: Efficient algorithms for single- and multi-track copy number segmentation. *BMC Genomics* **13**, 591 (2012). [Medline doi:10.1186/1471-2164-13-591](#)
55. J. Wang, C. G. Mullighan, J. Easton, S. Roberts, S. L. Heatley, J. Ma, M. C. Rusch, K. Chen, C. C. Harris, L. Ding, L. Holmfeldt, D. Payne-Turner, X. Fan, L. Wei, D. Zhao, J. C.



- Obenauer, C. Naeve, E. R. Mardis, R. K. Wilson, J. R. Downing, J. Zhang, CREST maps somatic structural variation in cancer genomes with base-pair resolution. *Nat. Methods* **8**, 652–654 (2011). [Medline doi:10.1038/nmeth.1628](#)
56. K. Chen, L. Chen, X. Fan, J. Wallis, L. Ding, G. Weinstock, TIGRA: A targeted iterative graph routing assembler for breakpoint assembly. *Genome Res.* **24**, 310–317 (2014). [Medline doi:10.1101/gr.162883.113](#)
57. W. J. Kent, BLAT—the BLAST-like alignment tool. *Genome Res.* **12**, 656–664 (2002). [Medline doi:10.1101/gr.229202](#). [Article published online before March 2002](#)
58. L. Yang, L. J. Luquette, N. Gehlenborg, R. Xi, P. S. Haseley, C. H. Hsieh, C. Zhang, X. Ren, A. Protopopov, L. Chin, R. Kucherlapati, C. Lee, P. J. Park, Diverse mechanisms of somatic structural variations in human cancer genomes. *Cell* **153**, 919–929 (2013). [Medline doi:10.1016/j.cell.2013.04.010](#)
59. M. Krzywinski, J. Schein, I. Birol, J. Connors, R. Gascoyne, D. Horsman, S. J. Jones, M. A. Marra, Circos: An information aesthetic for comparative genomics. *Genome Res.* **19**, 1639–1645 (2009). [Medline doi:10.1101/gr.092759.109](#)
60. P. J. Stephens, P. S. Tarpey, H. Davies, P. Van Loo, C. Greenman, D. C. Wedge, S. Nik-Zainal, S. Martin, I. Varela, G. R. Bignell, L. R. Yates, E. Papaemmanuil, D. Beare, A. Butler, A. Cheverton, J. Gamble, J. Hinton, M. Jia, A. Jayakumar, D. Jones, C. Latimer, K. W. Lau, S. McLaren, D. J. McBride, A. Menzies, L. Mudie, K. Raine, R. Rad, M. S. Chapman, J. Teague, D. Easton, A. Langerød, M. T. Lee, C. Y. Shen, B. T. Tee, B. W. Huimin, A. Broeks, A. C. Vargas, G. Turashvili, J. Martens, A. Fatima, P. Miron, S. F. Chin, G. Thomas, S. Boyault, O. Mariani, S. R. Lakhani, M. van de Vijver, L. van 't Veer, J. Foekens, C. Desmedt, C. Sotiriou, A. Tutt, C. Caldas, J. S. Reis-Filho, S. A. Aparicio, A. V. Salomon, A. L. Børresen-Dale, A. L. Richardson, P. J. Campbell, P. A. Futreal, M. R. Stratton; Oslo Breast Cancer Consortium (OSBREAC), The landscape of cancer genes and mutational processes in breast cancer. *Nature* **486**, 400–404 (2012). [Medline](#)
61. H. Bengtsson, P. Wirapati, T. P. Speed, A single-array preprocessing method for estimating full-resolution raw copy numbers from all Affymetrix genotyping arrays including GenomeWideSNP 5 & 6. *Bioinformatics* **25**, 2149–2156 (2009). [Medline doi:10.1093/bioinformatics/btp371](#)
62. H. Bengtsson, P. Neuvial, T. P. Speed, TumorBoost: Normalization of allele-specific tumor copy numbers from a single pair of tumor-normal genotyping microarrays. *BMC Bioinformatics* **11**, 245 (2010). [Medline doi:10.1186/1471-2105-11-245](#)
63. M. Ortiz-Estevez, A. Aramburu, H. Bengtsson, P. Neuvial, A. Rubio, CalMaTe: A method and software to improve allele-specific copy number of SNP arrays for downstream segmentation. *Bioinformatics* **28**, 1793–1794 (2012). [Medline doi:10.1093/bioinformatics/bts248](#)
64. C. Yau, D. Mouradov, R. N. Jorissen, S. Colella, G. Mirza, G. Steers, A. Harris, J. Ragoussis, O. Sieber, C. C. Holmes, A statistical approach for detecting genomic aberrations in heterogeneous tumor samples from single nucleotide polymorphism genotyping data. *Genome Biol.* **11**, R92 (2010). [Medline](#)
